# Supplementary material for: A global DNA methylation and gene expression analysis of early human B-cell development reveals a demethylation signature and transcription factor network
Source: PubMed Central journal article supplement — Nucleic Acids Res. 2012 Oct 16;40(22):11339–51. doi: 10.1093/nar/gks957 (PMC3526268; doi:10.1093/nar/gks957), 2012-10-16
Supplement: supp_gks957_nar-01506-x-2012-File003.pdf [file supp_gks957_nar-01506-x-2012-File003.pdf]

## Supplementary Methods and Data

### 1. Isolation of fetal B-cells and their progenitors.

Four stages of B-cell precursors were isolated through flow cytometry sorting (Supplementary Figure 1). The gating strategy used to sort FBM cells employed a PI<sup>-</sup> live cell gate, a light-scatter gate that encompassed lymphoid and progenitor cells followed by a gate to eliminate any lineage<sup>+</sup> cells that have not removed by the immunomagnetic bead depletion. CD34<sup>++</sup>CD19<sup>-</sup> early progenitors (S1) and CD19<sup>+</sup>CD34<sup>+</sup> B-cell progenitors (S2) were gated as shown in the dot plot. Additionally, CD19<sup>+</sup>CD34<sup>-</sup> B-cells (S3/4) were gated and sorted based on sIgM expression (red color in dot plot) using the gates shown in the histogram. Numbers refer to the percentage of events found in the corresponding gates. Light-density FBM cells were prepared using Lymphoprep (Axis-Shield PoC, Oslo, Norway). Light-density FBM cells were suspended in cold (4°C) blocking buffer consisting of phosphate-buffered saline (PBS) supplemented with 0.01% NaN<sub>3</sub> (Sigma Chemical Company; St. Louis, MO) and 5% normal mouse serum. FBM was depleted of a number of mature cell populations using BioMag goat anti-mouse IgG immunomagnetic beads (Qiagen Inc., Valencia, CA). Mature lineage<sup>+</sup> cells were labeled for depletion using saturating amounts of monoclonal antibodies (mAbs) conjugated with fluorescein isothiocyanate: CD3 (clone UCHT1, BioLegend, San Diego, CA), CD14 (clone Tük4, Invitrogen, Carlsbad, CA), CD56 (clone C5.9, Exalpha Biologicals Inc., Boston, MA) and CD235a (clone CLB-ery-1, Invitrogen). The depleted cells were then stained overnight in blocking buffer with anti-human IgM-phycoerythrin (PE) (clone G20-127, BD Biosciences, Franklin Lakes, NJ), CD19-allophycocyanin (APC) (clone HIB19, BioLegend) and CD34-PE-cyanine 7 (PE-Cy7) (clone 581, BioLegend). Cells were washed, suspended in PBS with 0.01% NaN<sub>3</sub> and 2 µg/ml propidium iodide (PI; Invitrogen) and filtered through a 40 µm cell strainer (BD Biosciences). Fluorescence-activated cell sorting was performed with a FACSAria cell sorter (BD Bioscience). All cell populations were isolated based on their lack of PI staining (live cells), low to moderate forward-light scatter, low side-light scatter, and lack of lineage antigen expression (FITC<sup>-</sup>).

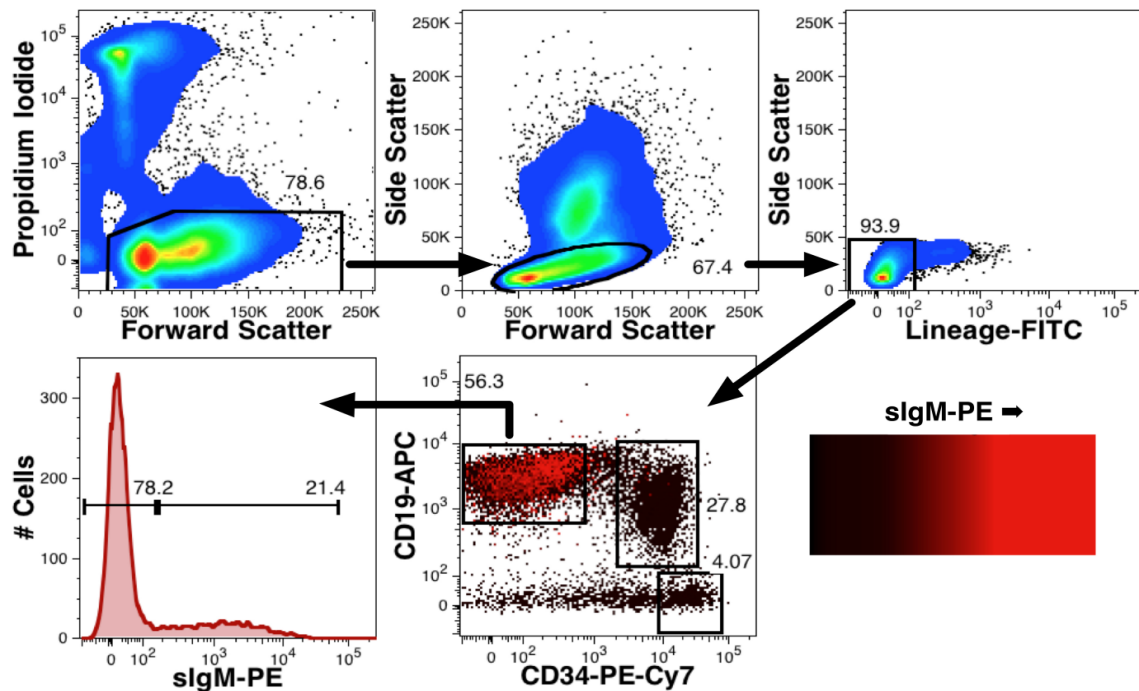

**Supplementary Figure 1. Isolation of fetal B-cells and their progenitors.** The gating strategy used to sort FBM cells employed a PI live cell gate, a light-scatter gate that encompassed lymphoid and progenitor cells followed by a gate to eliminate any lineage<sup>+</sup> cells that have not removed by the immunomagnetic bead depletion. CD34<sup>++</sup>CD19<sup>-</sup> early progenitors and CD19<sup>+</sup>CD34<sup>+</sup> B-cell progenitors were gated as shown in the dot plot. Additionally, CD19<sup>+</sup>CD34<sup>-</sup> B-cells were gated and sorted based on slgM expression (red color in dot plot) using the gates shown in the histogram. Numbers refer to the percentage of events found in the corresponding gates.

## 2. Characteristics of DNA methylation patterns of lymphoid progenitors

### Association of DNA methylation with promoters and CpG islands

The common lymphoid progenitors (S1) serve as the baseline DNA methylation levels before the cells are committed to any lineages. At S1, similar to a previous report, we observed lower methylation levels near the promoter region compared to the body of a gene (Supplementary Figure 2A). The correlation between body and promoter methylation is low in S1 cells with the spearman correlation coefficient equaling 0.17. If we designate  $\beta \leq 0.3$ ,  $0.3 < \beta \leq 0.7$  and  $\beta > 0.7$  to be hypo-methylated, semi-methylated and hyper-methylated respectively, CpG sites close to the promoter regions of genes in lymphoid progenitors were mostly hypomethylated (57% of loci), whereas 71% of those located in the body regions of genes were hypermethylated (Supplementary Figure 2). Loci within CpG islands (CGI) had the highest percentage of hypomethylated loci (73%), followed by CGI shores (within 2 kb distance from the nearest CGI; 36%) and CGI shelves (within 2 kb distance from the shore; 6%), establishing a methylation gradient that has its lowest point centering on CGIs and increases outwards. Interestingly, while CGIs were in general depleted of methylation, we found that CGIs located in the body region were more methylated and more variable than CGIs sites lying within promoters (Supplementary Figures 2A and B).

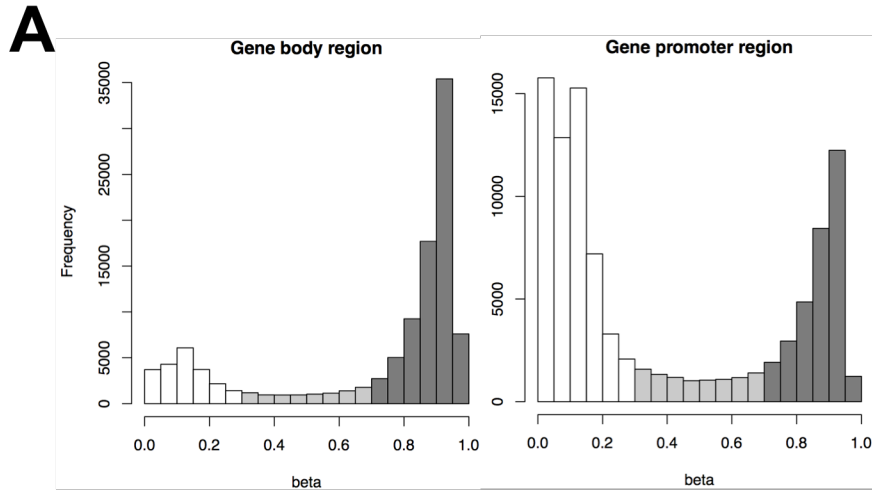

**B**

|                 |          | Median (MAD) of methylation beta values in S1 (lymphoid progenitor) cells |                |                |                |                |
|-----------------|----------|---------------------------------------------------------------------------|----------------|----------------|----------------|----------------|
|                 |          | CGI                                                                       | Shore          | Shelf          | non-Island     | All            |
| Promoter Region | TSS1500  | 0.10<br>(0.07)                                                            | 0.44<br>(0.47) | 0.88<br>(0.07) | 0.87<br>(0.09) | 0.37<br>(0.46) |
|                 |          | 0.07<br>(0.06)                                                            | 0.27<br>(0.10) | 0.65<br>(0.16) | 0.81<br>(0.19) | 0.11(0.10)     |
|                 | 5' UTR   | 0.12<br>(0.09)                                                            | 0.40<br>(0.44) | 0.88<br>(0.07) | 0.87<br>(0.25) | 0.65<br>(0.43) |
|                 |          | 0.12<br>(0.10)                                                            | 0.58<br>(0.52) | 0.89<br>(0.07) | 0.90<br>(0.06) | 0.16<br>(0.18) |
|                 | 1st Exon | 0.12<br>(0.10)                                                            | 0.58<br>(0.52) | 0.89<br>(0.07) | 0.90<br>(0.06) | 0.16<br>(0.18) |
| Body Region     | Body     | 0.28<br>(0.36)                                                            | 0.85<br>(0.15) | 0.90<br>(0.06) | 0.90<br>(0.06) | 0.88<br>(0.10) |
|                 |          | 0.75<br>(0.33)                                                            | 0.89<br>(0.07) | 0.90<br>(0.06) | 0.89<br>(0.06) | 0.89<br>(0.07) |
|                 | 3' UTR   | 0.75<br>(0.33)                                                            | 0.89<br>(0.07) | 0.90<br>(0.06) | 0.89<br>(0.06) | 0.89<br>(0.07) |
| intergenic      |          | 0.17<br>(0.18)                                                            | 0.76<br>(0.27) | 0.88<br>(0.07) | 0.87<br>(0.09) | 0.83<br>(0.15) |
| All             |          | 0.13<br>(0.12)                                                            | 0.68<br>(0.39) | 0.89<br>(0.07) | 0.88<br>(0.09) | 0.76<br>(0.28) |

**Supplementary Figure 2. Baseline DNA methylation levels at S1.** (A) Histograms of gene body and promoter methylation levels (in beta values) at the initial stage (S1). Bars are colored based on methylation levels: hypomethylated (beta ≤ 0.3) in white, semi-methylated (0.3 < beta ≤ 0.7) in light gray and hyper-methylated (beta > 0.7) in dark gray. (B) Median methylation (beta) values of CpG sites with respect to annotation categories. Median absolute deviations (MADs) are provided in parentheses. Cells are shaded according to the same beta cutoffs as in (A).

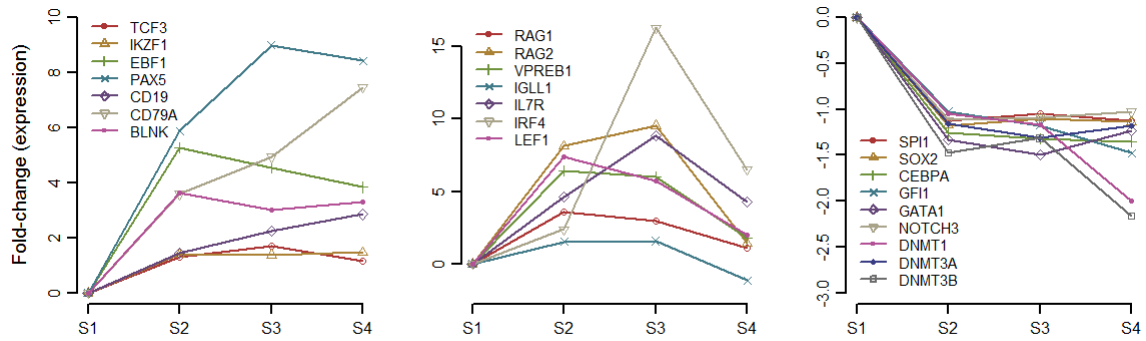

**Supplementary Figure 3.** The putative B-cell related genes, *TCF3*, *IKZF1*, *EBF1*, *PAX5*, *CD19*, *CD79A* and *BLNK*, were up-regulated during stage progression, while *RAG1*, *RAG2*, *VPREB1* and *IGLL1* were down-regulated again after activation. The non-B lineage genes such as *GFI1*, *GATA1* and *NOTCH3* were down regulated as well as DNA methyltransferases, *DNMT1*, *DNMT3A* and *DNMT3B*.

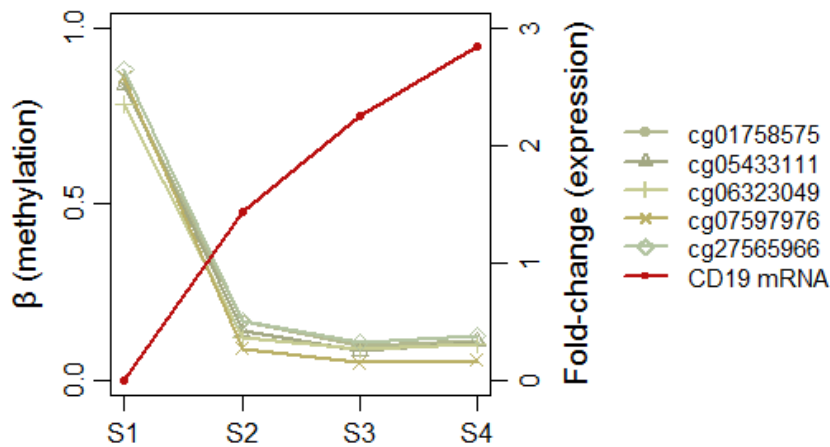

**Supplementary Figure 4.** Exemplary CpGs showing delayed or lagged expression changes. CpGs near *CD19* gene are substantially demethylated from S1 to S2 but also shows substantial expression changes in later stages.

### A 65-gene set

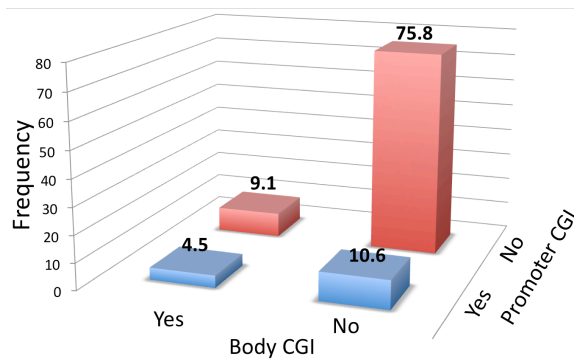

### B All genes on HM450

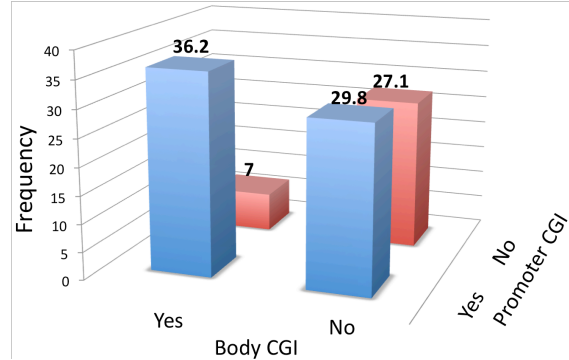

**Supplementary Figure 5. (A)** Methylation and gene expression changes of this 65-gene set are listed in Supplementary Table 1. Examining the CpG dinucleotide density of these 65 genes, we found that a surprisingly high percentage (75.8%) do not contain any CGI regions in their entire genic region, furthermore, 86.4% had no CGI at their promoter region. **(B)** This is in sharp contrast to the fact that only 7% of the transcripts on HM450 contain no overlapping CGIs in their genic region and 34.1% have non-CGI promoters.

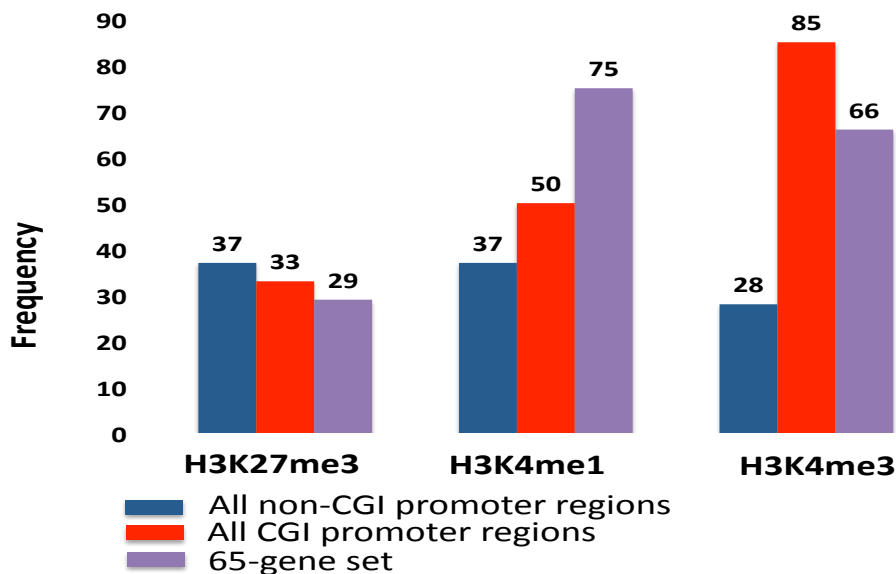

**Supplementary Figure 6.** To characterize the chromatin structure associated with the 65 genes that are listed in Supplementary Table 1, we examined the histone modification ChIP-seq data of the lymphostoid cell line GM12878 from the ENCODE project. A large majority, 75% and 66%, of these 65 genes have their non-CGI promoter regions marked with active histone modifications H3K4me1 and H3K4me3, respectively. Only 37% and 28% of all the non-CGI promoter regions on HM450 are marked with these two active histone modifications. The percentages are notably higher, at 50% and 85%, for CGI promoter regions.

**A**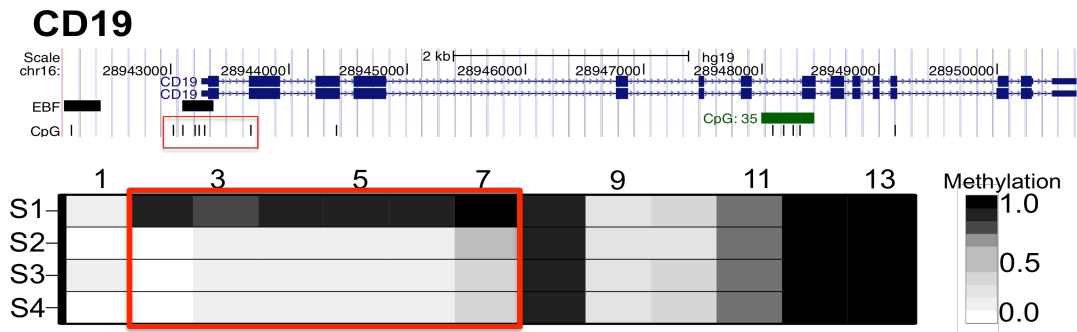**B**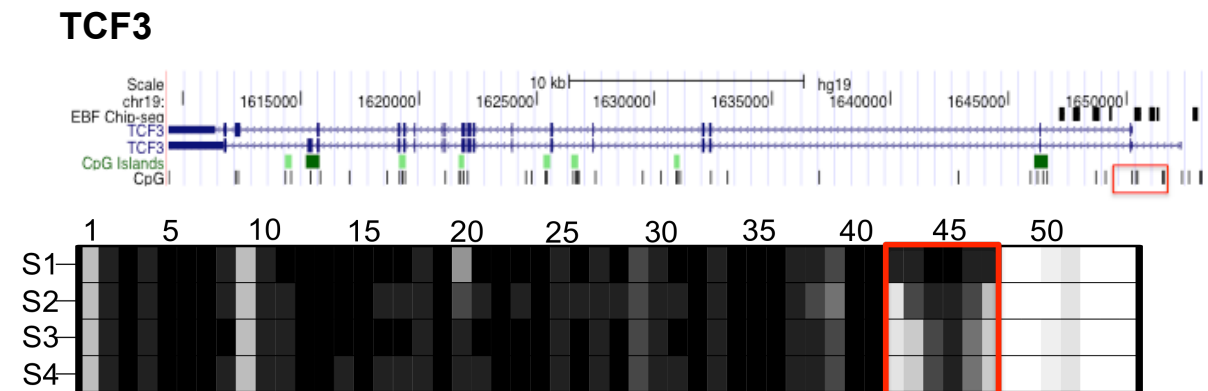**C**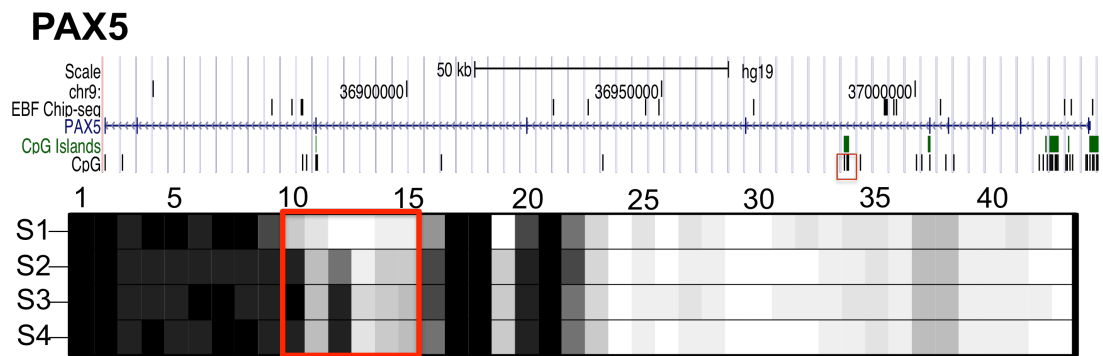**D**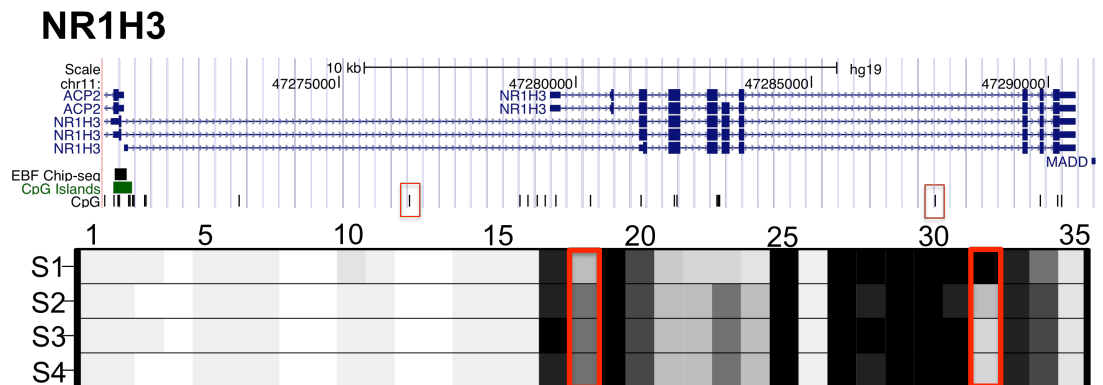

**Supplementary Figure 7. Exemplary genes of differential methylation during B cell development.** Upper panel shows genome browser annotation tracks for the specific gene. The first track is the RefSeq transcript. The second track indicates EBF binding sites based on the ChIP-Seq binding data from ENCODE. The third track displays CGIs and the fourth track marks the CpG sites on the HM450 array. The lower panel illustrates stage-specific methylation levels of these CpG sites. Red rectangles for both panels highlight DMRs. (A) CD19: its expression level was up-regulated (see Supplementary Figure 1). It showed demethylation of CpG sites in the transcription start site (TSS). (B) *TCF3* (E2A): the upstream TSS encoding isoform E12 was hypomethylated at S1 and its methylation level remained unchanged during B cell development whereas regions around the second TSS encoding isoform E47 underwent demethylation during stage progression.

**Supplementary Table 1.** AME analysis transcription factor binding sites within DMRs during different stage progression (P-values): DNA methylation changes during B-cell development (Seung-Tae Lee, et al).

| TF Motif       | <i>de novo</i> DMR (S1-S2) | de-DMR (S1-S2)        | de-DMR (S2-S3) | de-DMR (S3-S4)     |
|----------------|----------------------------|-----------------------|----------------|--------------------|
| V\$EBF_Q6      | 1                          | $3.2 \times 10^{-37}$ | 1              | 1                  |
| V\$OLF1_01     | 1                          | $1.4 \times 10^{-20}$ | 0.13           | 1                  |
| V\$ETS_Q4      | $1.8 \times 10^{-14}$      | $1.3 \times 10^{-12}$ | 0.99           | 1                  |
| V\$ETS_Q6      | $3.6 \times 10^{-10}$      | $7.3 \times 10^{-12}$ | 1              | 1                  |
| V\$ETS1_B      | $9.3 \times 10^{-7}$       | $2.2 \times 10^{-11}$ | 1              | 1                  |
| V\$ETS2_Q6     | $3.9 \times 10^{-6}$       | $3.6 \times 10^{-10}$ | 0.54           | 1                  |
| V\$ESE1_Q3     | 0.25                       | $4.1 \times 10^{-9}$  | 1              | 1                  |
| V\$E47_01      | 1                          | $6.1 \times 10^{-8}$  | 1              | $7 \times 10^{-4}$ |
| V\$CETS1P54_03 | 0.01                       | $1.4 \times 10^{-7}$  | 1              | 1                  |
| V\$CETS1P54_01 | $2.7 \times 10^{-5}$       | $4.6 \times 10^{-7}$  | 1              | 1                  |
| V\$GADP_01     | $2.2 \times 10^{-5}$       | $8.8 \times 10^{-7}$  | 1              | 1                  |
| V\$CETS168_Q6  | $2.3 \times 10^{-8}$       | $1.5 \times 10^{-6}$  | 1              | 1                  |
| V\$E12_Q6      | 1                          | $2.8 \times 10^{-6}$  | 0.59           | 0.42               |
| V\$E47_02      | 1                          | $1.9 \times 10^{-5}$  | 0.91           | 0.23               |
| V\$MOVOB_01    | 1                          | $1.9 \times 10^{-5}$  | 1              | 1                  |
| V\$ETS2_B      | $9.3 \times 10^{-5}$       | $6.9 \times 10^{-5}$  | 1              | 1                  |
| V\$MEF2_02     | 1                          | $8.6 \times 10^{-5}$  | 0.99           | 1                  |
| V\$OCT1_Q5_01  | 1                          | $1.4 \times 10^{-4}$  | 1              | 1                  |
| V\$PU1_Q6      | $4.1 \times 10^{-11}$      | $1.9 \times 10^{-4}$  | 1              | 1                  |
| V\$FLI1_Q6     | $1.1 \times 10^{-4}$       | $6.2 \times 10^{-4}$  | 1              | 1                  |
| V\$RSRFC4_01   | 1                          | $6.7 \times 10^{-4}$  | 0.1            | 1                  |
| V\$OCT1_01     | 1                          | $6.7 \times 10^{-4}$  | 0.93           | 1                  |
| V\$PU1_Q4      | $1.1 \times 10^{-14}$      | $6.5 \times 10^{-3}$  | 0.99           | 1                  |
| V\$ELF1_Q6     | $1.1 \times 10^{-10}$      | 0.026                 | 1              | 1                  |
| V\$SPI1_01     | $1.9 \times 10^{-7}$       | 0.14                  | 1              | 1                  |
| V\$SPIB_01     | $3 \times 10^{-7}$         | 1                     | 0.94           | 1                  |



**Supplementary Table 2.** Pathway enrichment analysis for differentially expressed genes in different stages (-log<sub>P</sub> values): Gene expression changes during B-cell development (Seung-Tae Lee, et al).

| Pathway                                                    | Up-DEG<br>(S1-S2) | Down-DEG<br>(S1-S2) | Up-DEG<br>(S2-S3) | Down-DEG<br>(S2-S3) | Up-DEG<br>(S3-S4) | Down-DEG<br>(S1-S2) |
|------------------------------------------------------------|-------------------|---------------------|-------------------|---------------------|-------------------|---------------------|
| Cyclins and Cell Cycle Regulation                          | 3.07              | 0                   | 0                 | 0.249               | 0.309             | 8.96                |
| Role of BRCA1 in DNA Damage Response                       | 3.64              | 0                   | 0                 | 0                   | 0                 | 22.8                |
| Mitotic Roles of Polo-Like Kinase                          | 4.68              | 0                   | 0                 | 0                   | 0                 | 10                  |
| Cell Cycle: G2/M DNA Damage Checkpoint Regulation          | 5.34              | 0                   | 0.0468            | 0                   | 0                 | 8.55                |
| Antigen Presentation Pathway                               | 7.09              | 0                   | 0                 | 0                   | 1.74              | 0                   |
| Protein Ubiquitination Pathway                             | 6.19              | 0                   | 0                 | 0.446               | 0                 | 1.35                |
| Estrogen Receptor Signaling                                | 4.82              | 0                   | 0                 | 0                   | 0                 | 0                   |
| Glucocorticoid Receptor Signaling                          | 4.82              | 0.795               | 0.169             | 0.444               | 0                 | 0                   |
| Protein Kinase A Signaling                                 | 4.66              | 0.449               | 0.452             | 1.45                | 0.228             | 0.213               |
| IL-3 Signaling                                             | 4.45              | 1.24                | 0.227             | 0.894               | 0.639             | 0.175               |
| HGF Signaling                                              | 4.39              | 1.11                | 0.154             | 1.61                | 0.445             | 0.259               |
| CCR3 Signaling in Eosinophils                              | 3.87              | 0.56                | 0.107             | 1.44                | 0.648             | 0.542               |
| Cdc42 Signaling                                            | 3.79              | 0                   | 0                 | 0.179               | 0.648             | 0                   |
| fMLP Signaling in Neutrophils                              | 3.79              | 0.576               | 0.413             | 1.5                 | 1.57              | 0.379               |
| RAN Signaling                                              | 3.75              | 0                   | 0                 | 0                   | 0                 | 1.48                |
| IL-8 Signaling                                             | 3.74              | 2.93                | 0.0956            | 2.13                | 2.72              | 0                   |
| Androgen Signaling                                         | 3.67              | 0.409               | 0                 | 1.17                | 0.202             | 0                   |
| ERK/MAPK Signaling                                         | 3.67              | 0.36                | 0                 | 1.41                | 0                 | 0                   |
| GM-CSF Signaling                                           | 3.67              | 0.567               | 2.3               | 0                   | 0.694             | 0                   |
| CXCR4 Signaling                                            | 3.62              | 1.37                | 0.342             | 2.39                | 1.04              | 0                   |
| Type I Diabetes Mellitus Signaling                         | 3.42              | 0.576               | 0                 | 1.78                | 0.664             | 0                   |
| T Cell Receptor Signaling                                  | 3.26              | 0.928               | 1.84              | 1.37                | 0.752             | 0.0197              |
| Calcium-induced T Lymphocyte Apoptosis                     | 3.19              | 0.567               | 0.276             | 1.44                | 1.19              | 0.0899              |
| CREB Signaling in Neurons                                  | 3.19              | 0.406               | 0.169             | 1.23                | 0.381             | 0                   |
| PKCθ Signaling in T Lymphocytes                            | 3.16              | 0.757               | 0.517             | 0.79                | 2.63              | 0                   |
| Telomerase Signaling                                       | 3.14              | 0                   | 0.151             | 0.632               | 0.443             | 0                   |
| Assembly of RNA Polymerase II Complex                      | 3.12              | 0                   | 0                 | 0                   | 0                 | 0                   |
| Antiproliferative Role of TOB in T Cell Signaling          | 3.08              | 0                   | 0.107             | 0                   | 0                 | 2.24                |
| Phospholipase C Signaling                                  | 3                 | 1.15                | 2.71              | 2.39                | 1.96              | 0                   |
| Prolactin Signaling                                        | 3                 | 0.705               | 0                 | 1.61                | 0.133             | 0                   |
| α-Adrenergic Signaling                                     | 3                 | 0.38                | 0.0737            | 1.44                | 0.51              | 0.193               |
| Role of NFAT in Regulation of the Immune Response          | 4.82              | 1.07                | 1.39              | 1.69                | 4.5               | 0                   |
| IL-4 Signaling                                             | 3.68              | 0.138               | 0.452             | 0                   | 3.13              | 0                   |
| iCOS-iCOSL Signaling in T Helper Cells                     | 3.19              | 0.283               | 1.64              | 1.53                | 3.51              | 0                   |
| CD28 Signaling in T Helper Cells                           | 3.13              | 0.756               | 2.54              | 0.785               | 3.9               | 0.0412              |
| Primary Immunodeficiency Signaling                         | 3.36              | 0                   | 3.35              | 0.377               | 1.38              | 0.402               |
| B Cell Development                                         | 5.72              | 0.35                | 3.43              | 0.231               | 4.5               | 0.171               |
| B Cell Receptor Signaling                                  | 6.33              | 0.395               | 4.67              | 0.362               | 2.66              | 0                   |
| PI3K Signaling in B Lymphocytes                            | 3.96              | 0.576               | 5.58              | 1.28                | 3.51              | 0                   |
| Role of JAK1, JAK2 and TYK2 in Interferon Signaling        | 0.129             | 0                   | 3.43              | 0                   | 0.309             | 0                   |
| Cholecystokinin/Gastrin-mediated Signaling                 | 2.11              | 1.11                | 0.147             | 3.19                | 0.714             | 0                   |
| T Helper Cell Differentiation                              | 0.556             | 0.512               | 0.247             | 1.37                | 3.13              | 0                   |
| Dendritic Cell Maturation                                  | 1.96              | 0.967               | 0                 | 0.733               | 4.16              | 0                   |
| TREM1 Signaling                                            | 0.237             | 2.75                | 0                 | 1.17                | 3.62              | 0                   |
| p53 Signaling                                              | 2.41              | 0.519               | 0.168             | 0.219               | 0.243             | 3.52                |
| Role of CHK Proteins in Cell Cycle Checkpoint Control      | 1.96              | 0                   | 0                 | 0                   | 0                 | 11.7                |
| Cell Cycle: G1/S Checkpoint Regulation                     | 1.93              | 0                   | 0                 | 0.698               | 0.405             | 6.95                |
| ATM Signaling                                              | 1.72              | 0                   | 0                 | 0                   | 0                 | 10.3                |
| Purine Metabolism                                          | 1.3               | 0.281               | 0                 | 0.596               | 0                 | 4.9                 |
| Pyrimidine Metabolism                                      | 1.22              | 0.56                | 0                 | 0.236               | 0                 | 5.85                |
| DNA Double-Strand Break Repair by Homologous Recombination | 0.776             | 0                   | 0                 | 0                   | 0                 | 3.81                |
| Mismatch Repair in Eukaryotes                              | 0.664             | 0                   | 0                 | 0                   | 0                 | 10.1                |
| Aryl Hydrocarbon Receptor Signaling                        | 0.525             | 0.574               | 0                 | 1.78                | 0                 | 4.28                |

|                                               |       |       |   |      |   |      |
|-----------------------------------------------|-------|-------|---|------|---|------|
| Lysine Degradation                            | 0.502 | 0.843 | 0 | 0    | 0 | 4.03 |
| Cell Cycle Control of Chromosomal Replication | 0.29  | 0     | 0 | 0.27 | 0 | 13.4 |

---

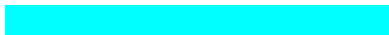

Supplemental Table 3a. Statistics of the 224 genes that had concurrent methylation and expression changes from S1 to S2.

| GeneSymbol | GeneTitle                       | Chrom | Methylation_S2vsS1 | Expression_S2vsS1 | tlimnID    | UCSC_RefGene_Group                 | UCSC_CpG_Islands_Names | Methylation_UCSC_CpG_Island | Methylation     |         |         |         | Expression |        |        |        |        |
|------------|---------------------------------|-------|--------------------|-------------------|------------|------------------------------------|------------------------|-----------------------------|-----------------|---------|---------|---------|------------|--------|--------|--------|--------|
|            |                                 |       |                    |                   |            |                                    |                        |                             | UCSC_CpG_Island |         |         |         | Mean       |        |        |        |        |
|            |                                 |       |                    |                   |            |                                    |                        |                             | Mean.S1         | Mean.S2 | Mean.S3 | Mean.S4 | ProbeSetID | Mean.S | Mean.S | Mean.S | Mean.S |
| GTDC1      | glycosyltransferase ch2:1444197 |       | -0.52              | 0.82              | cg25812095 | 5'UTR;5'UTR                        |                        |                             | 0.87            | 0.35    | 1.04    | 0.11    | 8055666    | 7.61   | 8.42   | 8.60   | 8.49   |
| TERF1      | telomeric repeat ch8:74083661   |       | -0.62              | 1.16              | cg18250453 | Body;Body                          | chr8:7392085'S_Shelf   |                             | 0.94            | 0.32    | 0.17    | 0.15    | 1846914    | 8.37   | 9.53   | 10.27  | 9.65   |
| RGS10      | regulator of G- ch10:121248     |       | 0.22               | -0.84             | cg20345915 | 5'UTR;Body;1stExon                 |                        | 0.57                        | 0.79            | 0.8     | 0.79    | 7396773 | 8.47       | 7.64   | 7.29   | 7.47   |        |
| LYN        | v-yes-1 Yamag ch8:5695492       |       | -0.20              | -0.90             | cg24856456 | 3'UTR;3'UTR                        |                        | 0.58                        | 0.39            | 0.32    | 0.31    | 8146500 | 8.80       | 7.90   | 10.22  | 11.02  |        |
| SLC35F2    | solute carrier f chr11:107166   |       | 0.36               | -0.68             | cg03851835 | Body                               |                        | 0.31                        | 0.66            | 0.68    | 0.65    | 7951485 | 7.50       | 6.82   | 6.55   | 6.89   |        |
| BLNK       | B-cell linker chr10:979409      |       | -0.43              | 2.06              | cg18448570 | TSS200;TSS200                      |                        | 0.61                        | 0.19            | 0.17    | 0.18    | 7935270 | 8.81       | 10.87  | 10.41  | 10.69  |        |
| PRTN3      | proteinase 3 chr19:791965       |       | -0.47              | -0.95             | cg24347562 | TSS1500                            | chr19:843468-N_Shelf   |                             | 0.73            | 0.26    | 0.25    | 0.24    | 8024048    | 9.14   | 8.20   | 7.99   | 8.14   |
| HMHB1      | histocompatibi chr5:14317191    |       | -0.51              | 1.41              | cg02228160 | Body                               |                        | 0.67                        | 0.15            | 0.11    | 0.1     | 8108900 | 8.07       | 9.47   | 9.30   | 9.21   |        |
| TOP1MT     | topoisomerase chr8:1446625      |       | 0.38               | -1.31             | cg17117981 | Body                               |                        | 0.49                        | 0.87            | 0.9     | 0.85    | 8153390 | 9.06       | 7.75   | 8.00   | 8.17   |        |
| EBF1       | early B-cell fac chr5:1580580   |       | 0.22               | 2.54              | cg18816534 | Body                               |                        | 0.31                        | 0.53            | 0.42    | 0.37    | 8115543 | 9.30       | 11.84  | 11.49  | 11.30  |        |
| IKZF2      | IKAROS family chr2:2135790      |       | 0.30               | 1.54              | cg14227558 | Body;Body                          |                        | 0.46                        | 0.76            | 0.79    | 0.8     | 8058670 | 7.73       | 9.27   | 10.74  | 10.30  |        |
| SHOC2      | src-2 suppress chr10:112669     |       | -0.33              | 1.62              | cg08253072 | 5'UTR                              | chr10:112678'S_Shore   |                             | 0.54            | 0.2     | 0.19    | 0.18    | 7930470    | 9.91   | 10.93  | 11.24  | 11.35  |
| PCCA       | propionyl Coen chr13:995393     |       | 0.23               | -1.11             | cg25084760 | Body;Body                          |                        | 0.33                        | 0.56            | 0.57    | 0.55    | 7969835 | 7.23       | 6.12   | 6.76   | 6.27   |        |
| PTRF       | polymerase 1 a chr17:378079     |       | 0.25               | -0.59             | cg27196880 | Body                               | chr17:405737-N_Shelf   |                             | 0.56            | 0.8     | 0.78    | 0.8     | 8015635    | 6.93   | 6.34   | 6.41   | 6.47   |
| EDM1       | ER degradator chr3:5204358      |       | -0.36              | 1.25              | cg16505233 | Body                               |                        | 0.48                        | 0.11            | 0.13    | 0.09    | 8077458 | 8.02       | 9.27   | 8.82   | 8.83   |        |
| IL1B       | interleukin 1, l chr2:1133037   |       | 0.29               | -0.92             | cg01290568 | 5'UTR                              |                        | 0.21                        | 0.5             | 0.51    | 0.47    | 8054722 | 8.19       | 7.27   | 6.35   | 5.98   |        |
| TESC       | tescalcin chr12:1159611         |       | -0.38              | -0.67             | cg14224600 | Body;Body;Body                     | chr12:117476'S_Shore   |                             | 0.8             | 0.42    | 0.44    | 0.4     | 7966749    | 8.50   | 7.83   | 7.03   | 7.03   |
| ETV6       | ets variant 6 chr12:116940      |       | -0.31              | -0.85             | cg06516865 | Body                               |                        | 0.37                        | 0.07            | 0.07    | 0.05    | 7953981 | 9.44       | 8.59   | 8.13   | 8.29   |        |
| CTCF       | CCCTC-binding chr16:661539      |       | -0.42              | 0.78              | cg04545079 | 5'UTR                              | chr16:675958'S_Shelf   |                             | 0.91            | 0.49    | 0.4     | 0.38    | 7996593    | 9.62   | 10.41  | 10.43  | 9.93   |
| ADAM28     | ADAM metallof chr8:2420752      |       | 0.28               | -2.36             | cg17969683 | TSS200;TSS200                      |                        | 0.15                        | 0.43            | 0.48    | 0.47    | 8145293 | 8.57       | 6.21   | 5.97   | 6.33   |        |
| RAB11F1P1  | RAB11 family i chr8:3783562     |       | -0.68              | -0.74             | cg22881435 | Body;TSS1500;Body                  |                        | 0.87                        | 0.19            | 0.12    | 0.11    | 8150225 | 8.18       | 7.45   | 7.77   | 8.37   |        |
| TBC1D1     | TBC1 (tre-2) ch4:3756910        |       | -0.54              | 0.88              | cg10274108 | Body                               |                        | 0.64                        | 0.11            | 0.13    | 0.09    | 8094574 | 8.83       | 9.71   | 10.34  | 10.52  |        |
| RNF220     | ring finger prot chr1:4464345   |       | 0.26               | -0.67             | cg01804134 | Body                               |                        | 0.55                        | 0.81            | 0.82    | 0.81    | 7900979 | 9.26       | 8.58   | 8.29   | 8.43   |        |
| QRSL1      | glutaminyl-tRN chr6:10718414    |       | -0.46              | 2.10              | cg18067520 | 3'UTR                              |                        | 0.63                        | 0.17            | 0.12    | 0.09    | 8121300 | 8.24       | 10.34  | 10.60  | 10.40  |        |
| POU2AF1    | POU class 2 as chr11:1107281    |       | -0.64              | 1.23              | cg10694914 | Body                               |                        | 0.75                        | 0.11            | 0.09    | 0.07    | 7951596 | 8.31       | 9.55   | 9.87   | 9.67   |        |
| CD84       | CD84 molecule chr1:1587751      |       | -0.39              | -1.05             | cg27304328 | Body                               |                        | 0.94                        | 0.55            | 0.17    | 0.1     | 7921637 | 7.73       | 6.68   | 7.85   | 8.09   |        |
| LTAF       | lipopolysaccha chr16:115493     |       | -0.74              | 0.90              | cg08767044 | 5'UTR;5'UTR;Body                   | chr16:116800N_Shore    |                             | 0.85            | 0.11    | 0.09    | 0.07    | 7999468    | 7.99   | 8.89   | 9.01   | 8.72   |
| RAPGEF1    | Rap guanine n chr9:1335414      |       | -0.40              | 2.08              | cg13655250 | Body;Body                          |                        | 0.65                        | 0.24            | 0.22    | 0.17    | 8164692 | 5.44       | 7.53   | 7.64   | 7.15   |        |
| PARP1      | poly (ADP-ribo chr11:2246150    |       | -0.59              | 0.62              | cg18590995 | Body                               |                        | 0.93                        | 0.33            | 0.11    | 0.08    | 7924733 | 9.47       | 10.10  | 10.25  | 10.13  |        |
| TYROBP     | TYRO protein t chr19:4108714    |       | 0.26               | -0.73             | cg21495704 | TSS200;TSS200                      |                        | 0.41                        | 0.67            | 0.74    | 0.7     | 8036224 | 9.66       | 8.93   | 8.66   | 8.97   |        |
| SLC8A1     | solute carrier f chr2:4019279   |       | -0.37              | 1.41              | cg08780166 | Body;Body;Body                     |                        | 0.91                        | 0.54            | 0.45    | 0.44    | 8051762 | 6.32       | 7.73   | 7.20   | 6.45   |        |
| ZCCHC7     | zinc finger, CCI chr9:3711046   |       | -0.25              | 1.21              | cg14060402 | Body                               |                        | 0.79                        | 0.54            | 0.16    | 0.25    | 8155234 | 9.13       | 10.33  | 10.33  | 10.42  |        |
| GCNT2      | glucosaminyl ( chr6:1063657)    |       | 0.26               | -0.70             | cg14112601 | TSS1500                            |                        | 0.27                        | 0.53            | 0.56    | 0.56    | 8116835 | 6.26       | 5.57   | 5.15   | 5.66   |        |
| FCER1G     | Fc fragment of chr1:1594516     |       | -0.65              | 0.98              | cg17935703 | TSS200                             | chr9:1396406'S_Shelf   |                             | 0.81            | 0.16    | 0.15    | 0.12    | 8152777    | 7.33   | 8.31   | 7.10   | 7.15   |
| CD52       | CD52 molecule chr1:2651698      |       | 0.22               | 0.62              | cg12517705 | Body;TSS1500                       |                        | 0.44                        | 0.12            | 0.31    | 0.16    | 7899160 | 10.19      | 11.40  | 11.46  | 11.46  |        |
| CMTM7      | CKLF-like MAR chr3:3240816      |       | -0.35              | 1.10              | cg07116972 | Body;Body                          |                        | 0.42                        | 0.07            | 0.07    | 0.05    | 8078405 | 8.91       | 10.01  | 10.04  | 9.69   |        |
| CDC42EP3   | CDC42 effecto chr2:3772424      |       | -0.29              | -1.06             | cg19275008 | 5'UTR                              |                        | 0.83                        | 0.54            | 0.41    | 0.35    | 8051573 | 7.27       | 6.21   | 6.12   | 6.55   |        |
| PXDN       | peroxidasin ho chr2:1614666     |       | -0.32              | 1.17              | cg01271695 | Body                               |                        | 0.4                         | 0.09            | 0.11    | 0.07    | 8050007 | 8.02       | 9.19   | 8.25   | 7.88   |        |
| KIT        | v-kit Hardy-Zu chr4:5521884     |       | -0.21              | -2.19             | cg17854066 | Body;Body                          |                        | 0.38                        | 0.59            | 0.59    | 0.58    | 8095110 | 9.89       | 7.70   | 6.29   | 5.81   |        |
| TBC1D15    | TBC1 domain f chr12:705198      |       | 0.37               | 0.66              | cg15437231 | Body;Body;Body;Body                |                        | 0.81                        | 0.44            | 0.42    | 0.42    | 7957186 | 9.64       | 10.30  | 10.23  | 9.90   |        |
| MYCN       | v-myc myeloc chr2:2998123       |       | 0.23               | -0.72             | cg19623054 | Body                               | chr2:1607980'S_Shelf   |                             | 0.61            | 0.85    | 0.88    | 0.87    | 8040419    | 7.98   | 7.26   | 7.01   | 7.01   |
| FAM65B     | family with sch chr6:2459134    |       | -0.23              | 0.72              | cg4960799  | 5'UTR                              | chr6:2491062N_Shore    |                             | 0.57            | 0.34    | 0.15    | 0.13    | 8124280    | 8.00   | 8.72   | 9.48   | 9.84   |
| DNMT       | deoxynucleotid chr10:980540     |       | -0.51              | 4.41              | cg20728490 | 5'UTR;1stExon;1stExon;5'UTR        |                        | 0.85                        | 0.34            | 0.18    | 0.16    | 7929574 | 7.82       | 12.23  | 8.06   | 6.84   |        |
| PSMB8      | proteasome (p chr6_cox_hap1     |       | -0.49              | 1.39              | cg11381564 | 3'UTR;3'UTR                        | chr6:3280628'S_Shore   |                             | 0.6             | 0.11    | 0.06    | 0.04    | 8178855    | 7.84   | 9.22   | 9.27   | 9.14   |
| FCER1G     | Fc fragment of chr1:1594516     |       | 0.28               | -1.26             | cg26394055 | TSS200                             |                        | 0.12                        | 0.4             | 0.45    | 0.43    | 7906720 | 7.92       | 6.66   | 5.54   | 5.97   |        |
| FAM107B    | family with sch chr10:146005    |       | -0.44              | 1.50              | cg14152591 | Body                               |                        | 0.33                        | 0.58            | 0.58    | 0.58    | 7991609 | 9.35       | 10.18  | 10.15  | 10.15  |        |
| MYO5C      | myosin VC chr15:5027181         |       | 0.50               | 1.12              | cg02703248 | Body                               |                        | 0.92                        | 0.41            | 0.24    | 0.15    | 7988876 | 7.62       | 8.73   | 5.95   | 6.04   |        |
| CD72       | CD72 molecule chr9:355997       |       | -0.22              | 2.47              | cg13409077 | TSS200                             | chr9:3561698'S_Shore   |                             | 0.34            | 0.12    | 0.14    | 0.12    | 8161004    | 7.38   | 9.85   | 10.97  | 11.49  |
| MBNL2      | muscleblind-like chr13:966725   |       | 0.31               | 0.77              | cg24714606 | Body;Body                          |                        | 0.34                        | 0.65            | 0.72    | 0.72    | 7969677 | 8.37       | 9.13   | 9.10   | 9.43   |        |
| CD81       | CD81 molecule chr11:235509      |       | -0.68              | 0.80              | cg02525637 | Body                               | chr11:240671'S_Shore   |                             | 0.93            | 0.25    | 0.12    | 0.09    | 7937802    | 9.34   | 10.14  | 10.52  | 10.04  |
| SH2D4B     | SH2 domain cc chr10:822876      |       | -0.76              | 1.29              | cg04421348 | TSS1500;Body chr10:822955'S_Shelf  |                        | 0.87                        | 0.11            | 0.09    | 0.08    | 7928723 | 6.45       | 7.75   | 6.78   | 6.73   |        |
| PLD1       | phospholipase chr3:1728008      |       | -0.24              | -1.43             | cg07064537 | 5'UTR;5'UTR                        |                        | 0.93                        | 0.7             | 0.56    | 0.56    | 8092134 | 7.07       | 5.64   | 5.37   | 5.60   |        |
| MEI2L2     | mediator comp chr3:1522868      |       | -0.54              | -0.72             | cg05094216 | Body                               |                        | 0.71                        | 0.18            | 0.16    | 0.15    | 8083360 | 6.70       | 5.99   | 6.03   | 5.88   |        |
| GPR126     | G protein-coupl chr6:1426646    |       | -0.23              | -0.65             | cg27656786 | Body;Body;Body;Body                |                        | 0.45                        | 0.22            | 0.26    | 0.24    | 8122365 | 6.41       | 5.76   | 5.67   | 5.81   |        |
| TSSC1      | tumor suppress chr2:3171743     |       | -0.61              | 0.95              | cg14950134 | Body                               |                        | 0.94                        | 0.33            | 0.13    | 0.11    | 8050060 | 7.67       | 8.62   | 8.40   | 7.97   |        |
| HDC        | histidine decar chr15:483214    |       | -0.23              | -1.55             | cg26188688 | Body                               |                        | 0.72                        | 0.49            | 0.48    | 0.44    | 7988672 | 7.71       | 6.16   | 5.89   | 5.98   |        |
| IL7R       | interleukin 7 r chr2:101118     |       | -0.48              | -2.53             | cg04312209 | 1stExon                            |                        | 0.82                        | 0.27            | 0.39    | 0.38    | 8104901 | 7.16       | 9.69   | 10.31  | 9.60   |        |
| GRB10      | growth factor r chr7:5062525    |       | -0.28              | -0.64             | cg10495332 | 5'UTR;Body;Body                    |                        | 0.92                        | 0.64            | 0.48    | 0.47    | 8139656 | 7.58       | 6.94   | 6.61   | 6.75   |        |
| VPREB1     | pre-B lymphoc chr22:209292      |       | -0.69              | 2.85              | cg04776489 | TSS1500                            |                        | 0.86                        | 0.17            | 0.11    | 0.1     | 8071646 | 8.32       | 11.17  | 10.91  | 9.36   |        |
| CSGALNACT1 | chondroitin sul chr8:1930595    |       | -0.28              | 1.14              | cg11365919 | Body;Body;Body chr8:1931903N_Shore |                        | 0.41                        | 0.12            | 0.13    | 0.1     | 8149574 | 6.59       | 7.73   | 6.85   | 7.34   |        |
| ALOX5AP    | arachidonate 5 chr13:302076     |       | -0.29              | 0.96              | cg08529529 | 1stExon                            |                        | 0.74                        | 0.44            | 0.22    | 0.19    | 7968344 | 8.36       | 9.33   | 8.54   | 9.84   |        |
| IGF2R      | insulin-like gr chr6:1603101    |       | -0.25              | 0.63              | cg16111231 | Body                               |                        | 0.8                         | 0.55            | 0.44    | 0.43    | 8123181 | 6.88       | 7.51   | 8.80   | 8.61   |        |
| IGLL1      | immunoglobuli chr22:224531      |       | -0.41              | 0.69              | cg19558972 | 1stExon;5'UTR;1stExon;5'UTR        |                        | 0.53                        | 0.11            | 0.11    | 0.1     | 8074909 | 10.15      | 10.84  | 10.80  | 9.97   |        |
| PBX1       | pre-B                           |       |                    |                   |            |                                    |                        |                             |                 |         |         |         |            |        |        |        |        |

|          |                                                             |       |       |                 |                                         |                       |      |      |      |      |         |       |       |       |       |
|----------|-------------------------------------------------------------|-------|-------|-----------------|-----------------------------------------|-----------------------|------|------|------|------|---------|-------|-------|-------|-------|
| PAG1     | phosphoprotein chr8:8204260                                 | -0.60 | 1.80  | cg19004971      | TSS1500                                 | chr8:82023851S_Shore  | 0.83 | 0.22 | 0.16 | 0.15 | 8151512 | 7.88  | 9.68  | 8.86  | 8.94  |
| C11orf21 | chromosome 1 chr11:227344f                                  | 0.24  | -0.77 | cg19766471      | Body;TSS1500;Body                       |                       | 0.26 | 0.5  | 0.56 | 0.55 | 7945734 | 7.70  | 6.93  | 6.99  | 7.18  |
| CPM      | carboxypeptidase chr12:675312z                              | 0.23  | 1.08  | cg02266731      | TSS1500                                 |                       | 0.67 | 0.9  | 0.92 | 0.91 | 7964834 | 6.47  | 7.55  | 8.75  | 8.73  |
| MSI2     | musashi homo chr17:526889s                                  | 0.39  | 0.60  | cg07377994      | Body;Body                               |                       | 0.29 | 0.68 | 0.65 | 0.59 | 8008682 | 9.04  | 9.65  | 9.82  | 9.59  |
| MS4A3    | membrane-spe chr11:595806f                                  | 0.21  | -2.27 | cg03348161      | TSS200;TSS200;TSS200                    |                       | 0.54 | 0.75 | 0.73 | 0.74 | 7940216 | 9.83  | 7.56  | 5.66  | 6.36  |
| ARID5B   | AT rich interad chr10:633310f                               | -0.26 | 1.54  | cg13344587      | Body                                    |                       | 0.82 | 0.56 | 0.4  | 0.35 | 7927732 | 7.83  | 9.37  | 9.60  | 9.68  |
| ZMIZ1    | zinc finger, MZ chr10:804987f                               | -0.45 | 0.59  | cg10427868      | 5'UTR                                   |                       | 0.58 | 0.13 | 0.13 | 0.11 | 7928558 | 8.46  | 9.05  | 8.32  | 7.58  |
| IGFBP3   | insulin-like growth factor chr7:2331635s                    | 0.29  | 0.97  | cg17209188      | Body                                    |                       | 0.55 | 0.84 | 0.88 | 0.88 | 8138566 | 8.14  | 9.11  | 8.67  | 8.51  |
| CD79A    | CD79A molecule chr19:470730c                                | -0.43 | 1.90  | cg19825589      | TSS1500;TSS1500                         |                       | 0.45 | 0.02 | 0.05 | 0.02 | 8029136 | 8.15  | 10.05 | 10.46 | 11.05 |
| IRF8     | interferon regulatory factor chr16:844902z                  | -0.41 | -1.34 | cg27208925      | Body                                    |                       | 0.57 | 0.16 | 0.1  | 0.07 | 7997172 | 10.60 | 9.27  | 9.20  | 10.04 |
| SNAPIN   | SNAP-associated protein chr11:1518977z                      | -0.68 | 1.12  | cg06942637      | 3'UTR                                   | chr11:1536310fS_Shelf | 0.82 | 0.14 | 0.18 | 0.16 | 7905598 | 7.88  | 9.00  | 9.11  | 8.86  |
| PRKCE    | protein kinase chr2:4573254f                                | -0.29 | 0.98  | cg02073763      | Body                                    |                       | 0.58 | 0.29 | 0.09 | 0.07 | 8041763 | 7.63  | 8.61  | 9.02  | 8.75  |
| RANBP9   | RAN binding protein chr6:1372970f                           | -0.54 | 0.81  | cg08622666      | Body                                    |                       | 0.83 | 0.29 | 0.28 | 0.29 | 8123989 | 9.76  | 10.57 | 10.50 | 10.09 |
| USD26    | dual specificity phosphatase chr8:3356839c                  | -0.38 | 0.60  | cg00319774      | 5'UTR                                   | chr8:3345691fN_Shore  | 0.45 | 0.07 | 0.09 | 0.06 | 8150197 | 7.38  | 7.98  | 7.52  | 7.47  |
| PDS3     | pleckstrin and homology domain chr8:1848234z                | 0.22  | 2.56  | cg06399735      | Body                                    |                       | 0.62 | 0.84 | 0.85 | 0.86 | 8149555 | 6.92  | 9.48  | 8.16  | 7.74  |
| RAG1     | recombination protein chr11:364939f                         | -0.58 | 1.96  | cg06288355      | TSS200                                  |                       | 0.73 | 0.14 | 0.17 | 0.12 | 7939398 | 7.26  | 9.23  | 8.83  | 7.47  |
| TNIN2    | tropomyosin 1 type chr11:181675f                            | -0.26 | -0.60 | cg14975206      | TSS1500;TSS200;5'UTR                    |                       | 0.37 | 0.11 | 0.11 | 0.08 | 7937728 | 8.29  | 7.69  | 7.71  | 7.85  |
| ID3      | inhibitor of DNA methylation chr11:2375699f                 | 0.24  | 1.16  | cg18150584      | TSS1500                                 | chr11:2388568zS_Shore | 0.15 | 0.39 | 0.42 | 0.36 | 7913655 | 6.58  | 7.74  | 7.37  | 6.95  |
| CEP192   | centrosomal protein chr18:129984f                           | -0.36 | 0.83  | cg18.18.10D0800 | Body                                    |                       | 0.54 | 0.18 | 0.12 | 0.11 | 8020267 | 8.62  | 9.45  | 9.54  | 8.81  |
| STAT5A   | signal transducer chr17:376930f                             | 0.32  | -0.68 | cg05744184      | 3'UTR                                   | chr17:404642zN_Shore  | 0.23 | 0.55 | 0.59 | 0.58 | 8007212 | 8.17  | 7.49  | 7.06  | 7.01  |
| ILSR4    | interleukin 5 receptor chr3:3086421z                        | -0.27 | -1.59 | cg14749590      | 5'UTR;5'UTR;5'UTR;5'UTR;5'UTR           |                       | 0.88 | 0.61 | 0.46 | 0.45 | 8085062 | 7.28  | 5.69  | 5.40  | 5.53  |
| CAMK1D   | calcium/calmodulin-dependent protein kinase chr10:124314f   | -0.45 | 0.73  | cg26169081      | Body;Body                               |                       | 0.82 | 0.37 | 0.35 | 0.29 | 7926223 | 8.23  | 8.96  | 9.03  | 9.10  |
| ERLIN1   | ER lipid raft associated protein chr10:101898f              | 0.27  | -0.80 | cg26746309      | Body;Body                               | chr10:101945fN_Shelf  | 0.16 | 0.43 | 0.47 | 0.46 | 7935692 | 10.33 | 9.53  | 9.17  | 8.57  |
| GATA2    | GATA binding factor chr3:1296809f                           | -0.27 | -0.87 | cg15038286      | Body;Body;Body                          |                       | 0.8  | 0.53 | 0.57 | 0.52 | 8090469 | 8.03  | 7.16  | 7.03  | 7.11  |
| LY86     | lymphocyte antigen 6E chr6:6533340c                         | -0.56 | 1.12  | cg13125224      | TSS1500;Body                            |                       | 0.81 | 0.26 | 0.21 | 0.2  | 8116734 | 7.67  | 8.79  | 9.46  | 10.18 |
| CUL3     | cullin 3 chr2:2250431f                                      | 0.23  | 0.94  | cg25451702      | Body                                    |                       | 0.24 | 0.47 | 0.36 | 0.3  | 8059393 | 9.57  | 10.51 | 10.70 | 10.57 |
| ZBTB16   | zinc finger and homeobox protein chr11:113435f              | 0.48  | -1.03 | cg04226002      | Body;Body                               | chr11:113953fN_Shore  | 0.33 | 0.81 | 0.83 | 0.82 | 7943984 | 8.10  | 7.07  | 6.94  | 7.13  |
| KATNAL1  | katanin p60 subunit chr13:296747f                           | 0.23  | 1.31  | cg02788021      | TSS1500                                 | chr13:308808fS_Shore  | 0.26 | 0.49 | 0.53 | 0.53 | 7970844 | 7.71  | 9.02  | 9.14  | 8.75  |
| SLC9A9   | solute carrier family 9 member A chr3:1444667f              | -0.54 | 1.02  | cg03804400      | Body                                    |                       | 0.91 | 0.37 | 0.26 | 0.25 | 8091260 | 6.65  | 7.66  | 6.48  | 6.99  |
| MBNL1    | muscleblind-like protein chr3:1534685f                      | 0.36  | 0.83  | cg09219813      | TSS200;TSS200;5'UTR;TSS200;5'UTR;TSS200 |                       | 0.43 | 0.79 | 0.82 | 0.81 | 8083429 | 10.48 | 11.20 | 11.42 | 11.36 |
| C11orf28 | chromosome 11 chr10:998844f                                 | -0.68 | 0.85  | cg03302822      | 5'UTR                                   |                       | 0.84 | 0.16 | 0.12 | 0.11 | 7929179 | 7.87  | 8.72  | 9.06  | 8.74  |
| SLC12A6  | solute carrier family 12 member 6 chr15:323094f             | -0.31 | 0.87  | cg01053714      | TSS1500                                 | chr15:346295fS_Shore  | 0.85 | 0.54 | 0.38 | 0.33 | 7987192 | 8.67  | 9.55  | 9.54  | 9.40  |
| PDGFC    | platelet-derived growth factor receptor chr4:1579022f       | -0.46 | -1.86 | cg18933943      | Body                                    |                       | 0.87 | 0.4  | 0.33 | 0.3  | 8103399 | 7.98  | 6.13  | 5.44  | 5.80  |
| DAZAP2   | DAZ associated factor chr12:499188f                         | -0.21 | 1.02  | cg24637417      | 3'UTR;3'UTR;3'UTR                       | chr12:516324fS_Shelf  | 0.62 | 0.83 | 0.84 | 0.83 | 7955464 | 7.76  | 10.56 | 10.71 | 10.83 |
| MAP1LC3B | microtubule-associated protein 1LC3B chr16:2068605f         | 0.21  | 0.79  | cg16.2068605f   | 3'UTR                                   | chr16:874413fN_Shelf  | 0.34 | 0.13 | 0.12 | 0.07 | 7997740 | 7.46  | 8.47  | 8.29  | 8.69  |
| EFHA1    | EF-hand domain protein chr13:209648f                        | 0.20  | 0.59  | cg22280671      | Body                                    |                       | 0.57 | 0.77 | 0.77 | 0.81 | 7970546 | 7.92  | 8.51  | 8.61  | 8.52  |
| PRKAA1   | protein kinase, alpha chr5:4079523f                         | 0.21  | 0.74  | cg13345558      | Body;Body                               | chr5:4079765fN_Shore  | 0.61 | 0.82 | 0.82 | 0.82 | 8111796 | 8.05  | 8.79  | 8.55  | 8.71  |
| HLA-DMB  | major histocompatibility complex class II DMB chr6:qbl_hap2 | 0.42  | 0.61  | cg10453850      | Body                                    |                       | 0.35 | 0.77 | 0.82 | 0.78 | 8180078 | 8.69  | 9.30  | 9.71  | 10.40 |
| PHK8     | phosphorylase kinase subunit 8 chr16:460527f                | -0.21 | 0.83  | cg03720617      | Body;Body                               |                       | 0.35 | 0.14 | 0.14 | 0.13 | 7995382 | 8.59  | 9.42  | 9.36  | 9.40  |
| ARPP-21  | cyclic AMP-dependent protein kinase subunit 21 chr8:356502f | -0.51 | 2.97  | cg17936572      | 5'UTR                                   |                       | 0.71 | 0.21 | 0.16 | 0.15 | 8078497 | 6.34  | 9.30  | 9.46  | 8.39  |
| RAB8B    | RAB8B, member B chr15:12687f                                | 0.33  | 0.59  | cg17068735      | Body                                    |                       | 0.26 | 0.59 | 0.66 | 0.62 | 7984112 | 8.71  | 9.45  | 8.99  | 9.37  |
| CD22     | CD22 molecule chr19:405119f                                 | -0.73 | 2.31  | cg12126686      | 5'UTR                                   |                       | 0.88 | 0.15 | 0.12 | 0.11 | 8027837 | 7.49  | 9.80  | 10.04 | 10.67 |
| ALOX5    | arachidonate 5-lipoxygenase chr10:451896f                   | -0.37 | 0.61  | cg09832911      | Body                                    | chr10:459228zS_Shore  | 0.61 | 0.24 | 0.22 | 0.18 | 7927215 | 7.24  | 7.86  | 8.59  | 9.60  |
| FAIM3    | Fas apoptosis signaling protein 3 chr11:2051442z            | -0.22 | 1.65  | cg22945467      | TSS1500;TSS1500;TSS200                  |                       | 0.38 | 0.16 | 0.17 | 0.15 | 7923917 | 7.30  | 8.94  | 9.49  | 10.58 |
| PAK2     | p21 protein kinase (Cdk2) chr3:1979513f                     | 0.20  | 1.03  | cg12930392      | 5'UTR                                   |                       | 0.41 | 0.61 | 0.64 | 0.65 | 8084963 | 8.78  | 9.82  | 9.99  | 9.89  |
| SAPS3    | SAPS domain factor chr11:679847f                            | -0.28 | 0.60  | cg10133100      | 5'UTR;5'UTR;5'UTR;5'UTR;5'UTR           |                       | 0.69 | 0.42 | 0.3  | 0.3  | 7942032 | 9.50  | 10.10 | 10.15 | 9.91  |
| CORO2B   | coronin, actin 1 family chr15:666586f                       | -0.74 | 0.87  | cg19905757      | Body                                    |                       | 0.84 | 0.11 | 0.08 | 0.08 | 7984475 | 6.65  | 7.52  | 7.59  | 7.54  |
| KIAA0182 | KIAA0182 chr16:842025f                                      | -0.54 | -0.82 | cg02817932      | Body;Body                               | chr16:856841fN_Shore  | 0.88 | 0.34 | 0.31 | 0.35 | 7997680 | 8.60  | 7.78  | 8.02  | 8.09  |
| ZNF608   | zinc finger protein chr5:1240005f                           | -0.42 | -0.96 | cg26696655      | Body                                    |                       | 0.91 | 0.49 | 0.33 | 0.31 | 8113761 | 8.08  | 9.04  | 8.89  | 8.93  |
| ARHGEF3  | Rho guanine nucleotide exchange factor 3 chr3:2673648f      | 0.26  | -0.97 | cg11229273      | Body                                    |                       | 0.6  | 0.87 | 0.88 | 0.88 | 8088247 | 7.95  | 6.99  | 7.74  | 7.89  |
| SNX29    | sorting nexin 2 chr16:120801f                               | -0.50 | 0.81  | cg02910054      | Body                                    |                       | 0.66 | 0.16 | 0.15 | 0.13 | 7993281 | 7.88  | 8.69  | 8.64  | 8.95  |
| EPST11   | epithelial protein stem cell 11 chr12:423585f               | -0.34 | -1.03 | cg17531911      | TSS1500;TSS1500;TSS1500;TSS1500;TSS1500 | chr12:435660zS_Shore  | 0.38 | 0.14 | 0.12 | 0.12 | 8171297 | 7.22  | 6.67  | 6.60  | 7.43  |
| MGC29506 | hypothetical protein chr5:1387510f                          | -0.69 | 1.03  | cg13500819      | lncRNA                                  | chr5:1387277fN_Shelf  | 0.82 | 0.14 | 0.12 | 0.1  | 8114511 | 8.43  | 9.46  | 9.56  | 9.70  |
| LSP1     | lymphocyte-stimulated protein 1 chr11:183077f               | -0.68 | -0.84 | cg08687540      | 5'UTR;1stExon                           | chr11:189203fN_Shore  | 0.74 | 0.06 | 0.07 | 0.04 | 7937735 | 9.32  | 8.48  | 8.99  | 9.01  |
| DTX1     | deltex homolog chr12:111979f                                | -0.49 | 0.92  | cg08447520      | Body                                    | chr12:113515fN_Shelf  | 0.93 | 0.43 | 0.17 | 0.1  | 7958931 | 7.64  | 8.56  | 9.26  | 9.62  |
| TBXAS1   | thromboxane synthase chr7:1391245f                          | -0.36 | -0.75 | cg18568570      | Body;Body;Body;Body;Body                |                       | 0.74 | 0.37 | 0.34 | 0.33 | 8136557 | 7.77  | 7.02  | 6.65  | 6.77  |
| PAK5     | paired box 5 chr9:3683237f                                  | 0.64  | 2.66  | cg14317609      | Body                                    | chr9:3698598fIsland   | 0.07 | 0.7  | 0.85 | 0.85 | 8161211 | 7.90  | 10.57 | 11.07 | 11.07 |
| ARIH1    | ariadne homolog chr15:705537f                               | -0.31 | 0.69  | cg15188939      | Body                                    |                       | 0.86 | 0.55 | 0.25 | 0.28 | 7984641 | 9.03  | 9.72  | 9.64  | 9.43  |
| LGALS1   | lectin, galactosyl transferase 1 chr22:364015f              | 0.25  | -0.90 | cg07219769      | TSS200                                  | chr22:380730zN_Shore  | 0.44 | 0.69 | 0.75 | 0.68 | 8072876 | 9.66  | 8.76  | 8.51  | 8.63  |
| BCL11A   | B-cell CLL/lymphoma cell 11 chr2:6053180f                   | -0.23 | 0.59  | cg00543073      | Body;Body;Body                          | chr2:6077659fN_Shelf  | 0.39 | 0.16 | 0.2  | 0.17 | 8052399 | 9.68  | 10.27 | 9.47  | 9.90  |
| BTBD3    | BTB domain containing protein 3 chr20:118194f               | 0.35  | 0.91  | cg20981848      | Body;Body                               |                       | 0.39 | 0.73 | 0.77 | 0.72 | 8060988 | 7.75  | 8.67  | 8.96  | 8.16  |
| ITPR1    | inositol 1,4,5-trisphosphate receptor 1 chr3:4510136f       | 0.27  | 0.96  | cg21407899      | Body;Body;Body                          |                       | 0.31 | 0.58 | 0.58 | 0.57 | 8077376 | 8.31  | 9.27  | 8.18  | 8.97  |
| ETS1     | vets erythroblast transformation specific 1 chr11:127833f   | -0.25 | 1.35  | cg24066451      | Body                                    | chr11:128419fIsland   | 0.92 | 0.67 | 0.69 | 0.65 | 7952601 | 8.40  | 9.75  | 10.77 | 10.94 |
| AK5      | adenylate kinase family class 5 chr11:7752025f              | -0.39 | 1.30  | cg10386431      | Body;Body                               |                       | 0.58 | 0.18 | 0.17 | 0.18 | 7902452 | 6.10  | 7.40  | 6.27  | 5.60  |
| CSF3R    | colony stimulating factor receptor 3 chr11:3760423f         | 0.28  | -1.70 | cg07285167      | TSS1500;TSS1500;TSS1500;TSS1500         |                       | 0.49 | 0.76 | 0.8  | 0.79 | 7914950 | 8.13  | 6.43  | 6.26  | 6.30  |
|          |                                                             |       |       |                 |                                         |                       |      |      |      |      |         |       |       |       |       |

Supplemental Table 3b. Statistics of the 60 genes that had concurrent methylation and expression changes from S2 to S3.

| GeneSymbol | GeneTitle                                        | ChrLoc        | Methylation_S3vsS2 | Expression_S3vsS2 | TlmmID     | UCSC_RefGene_Group            | Methylation            |                                               | Expression |         |         |         |            |         |         |         |         |
|------------|--------------------------------------------------|---------------|--------------------|-------------------|------------|-------------------------------|------------------------|-----------------------------------------------|------------|---------|---------|---------|------------|---------|---------|---------|---------|
|            |                                                  |               |                    |                   |            |                               | UCSC_CpG_Islands_Names | UCSC_CpG_Islands_Relation_to_UCSC_CpG_Islands | Mean.S1    | Mean.S2 | Mean.S3 | Mean.S4 | ProbeSetID | Mean.S1 | Mean.S2 | Mean.S3 | Mean.S4 |
| CD84       | CD84 molecule                                    | chr1:1587775  | -0.4               | 1.17              | cg13188263 | 3'UTR                         |                        |                                               | 0.94       | 0.83    | 0.42    | 0.18    | 7921637    | 7.73    | 6.68    | 7.85    | 8.09    |
| FAM65B     | family with seqchr6:2491249                      |               | -0.3               | 0.76              | cg13708298 | 5'UTR                         |                        |                                               | 0.54       | 0.66    | 0.35    | 0.38    | 8124280    | 8.00    | 8.72    | 9.48    | 9.84    |
| ALOX5AP    | arachidonate 5chr13:3020764                      |               | -0.22              | -0.79             | cg08529529 | 1stExon                       |                        |                                               | 0.74       | 0.44    | 0.22    | 0.19    | 7968344    | 8.36    | 9.33    | 8.54    | 9.84    |
| IGF2R      | insulin-like growth factor 2                     | chr6:1603101  | -0.27              | 1.29              | cg09555124 | Body                          |                        |                                               | 0.85       | 0.68    | 0.41    | 0.23    | 8123181    | 6.88    | 7.51    | 8.80    | 8.61    |
| ZNF423     | zinc finger protein 423                          | chr16:480820  | -0.23              | -0.72             | cg03087880 | Body                          | chr16:496695: N_Shelf  |                                               | 0.92       | 0.65    | 0.43    | 0.45    | 8001337    | 6.80    | 7.56    | 6.84    | 6.84    |
| GCET2      | germinal center protein 2                        | chr3:1133223  | -0.45              | 1.75              | cg12663553 | TSS200;TSS200                 |                        |                                               | 0.81       | 0.68    | 0.23    | 0.21    | 8089478    | 6.43    | 8.10    | 9.84    | 9.13    |
| LTA        | lymphotxin alpha                                 | chr6:qbl_hap2 | -0.24              | -0.97             | cg14441276 | TSS1500;TSS200                |                        |                                               | 0.88       | 0.41    | 0.18    | 0.12    | 8179258    | 7.71    | 8.53    | 7.56    | 8.00    |
| BTG2       | BTG family, member 1                             | chr1:2015412  | -0.2               | 0.68              | cg01798157 | 3'UTR                         | chr1:2032743: S_Shore  |                                               | 0.8        | 0.67    | 0.47    | 0.43    | 7908917    | 8.78    | 10.06   | 10.74   | 10.74   |
| TCL6       | T-cell leukemia protein 6                        | chr14:951872  | -0.24              | 1.71              | cg07036035 | 3'UTR                         |                        |                                               | 0.93       | 0.86    | 0.62    | 0.49    | 7976523    | 6.19    | 6.96    | 8.67    | 8.56    |
| SERINC5    | serine incorporator 5                            | chr5:7944280  | -0.31              | -1.08             | cg14711743 | Body                          |                        |                                               | 0.79       | 0.88    | 0.57    | 0.56    | 8112865    | 7.57    | 8.54    | 7.46    | 6.90    |
| FCRLA      | Fc receptor-like protein 1                       | chr1:1599433  | -0.47              | 2.61              | cg04888234 | TSS1500                       |                        |                                               | 0.73       | 0.61    | 0.15    | 0.12    | 7906786    | 6.59    | 7.58    | 10.20   | 11.12   |
| TCF7L2     | transcription factor 7-like 2                    | chr10:114700  | -0.22              | -2.47             | cg03339956 | Body;Body;Body;Body;Body      |                        |                                               | 0.72       | 0.64    | 0.41    | 0.39    | 7930537    | 8.98    | 9.92    | 7.44    | 7.32    |
| PDIAS5     | protein disulfide isomerase 5                    | chr3:1242685  | -0.36              | 0.70              | cg27383859 | Body;Body                     |                        |                                               | 0.92       | 0.65    | 0.28    | 0.15    | 8082133    | 7.85    | 7.06    | 7.76    | 7.59    |
| ZMIZ1      | zinc finger, MIZ domain 1                        | chr10:804987  | -0.21              | -0.73             | cg02145310 | 5'UTR                         |                        |                                               | 0.84       | 0.4     | 0.19    | 0.17    | 7928558    | 8.46    | 9.05    | 8.32    | 7.85    |
| IKZF3      | IKAROS family zinc finger 3                      | chr17:351747  | -0.43              | 2.56              | cg08441850 | Body;Body;Body;Body;Body;Body |                        |                                               | 0.74       | 0.64    | 0.21    | 0.19    | 8014891    | 6.20    | 7.12    | 9.67    | 10.14   |
| ARGHGF3    | Rho guanine nucleotide exchange factor 3         | chr3:5673648  | -0.22              | 0.75              | cg25799109 | 5'UTR;5'UTR                   |                        |                                               | 0.86       | 0.86    | 0.64    | 0.66    | 8088247    | 7.95    | 6.99    | 7.74    | 7.89    |
| DTX1       | deltex homolog 1                                 | chr2:111979   | -0.27              | 0.70              | cg08447520 | Body                          | chr12:113515: N_Shelf  |                                               | 0.93       | 0.43    | 0.17    | 0.1     | 7958931    | 7.64    | 8.56    | 9.26    | 9.62    |
| PION       | pigeon homolo 1                                  | chr7:7679678  | -0.25              | 0.73              | cg19348272 | Body                          | chr7:7704484: N_Shore  |                                               | 0.94       | 0.76    | 0.51    | 0.46    | 8140478    | 6.42    | 8.37    | 9.10    | 9.51    |
| APLP2      | amyloid beta (A2)                                | chr11:129445  | -0.31              | 0.99              | cg25354657 | Body;Body;Body;Body           | chr11:129993: N_Shelf  |                                               | 0.83       | 0.49    | 0.19    | 0.15    | 7945182    | 10.50   | 9.28    | 10.26   | 10.19   |
| PPFBP1     | PTPRF interacting protein 1                      | chr2:275683   | -0.27              | -0.92             | cg20095669 | 5'UTR;5'UTR                   |                        |                                               | 0.92       | 0.86    | 0.6     | 0.61    | 7954559    | 7.56    | 8.76    | 7.84    | 7.34    |
| MPEG1      | macrophage efferocytosis protein 1               | chr11:587347  | -0.26              | 2.04              | cg26340740 | 1stExon;5'UTR                 |                        |                                               | 0.56       | 0.63    | 0.36    | 0.19    | 7948364    | 8.36    | 7.09    | 9.13    | 9.63    |
| BAALC      | brain and acut leukemia 1                        | chr8:1042220  | -0.26              | -0.82             | cg01706991 | Body;Body                     |                        |                                               | 0.92       | 0.88    | 0.63    | 0.61    | 8147756    | 8.25    | 7.18    | 6.36    | 6.56    |
| SPTBN1     | spectrin, beta, 1                                | chr2:5453695  | -0.39              | 0.60              | cg10854528 | Body;Body                     | chr2:5485609: N_Shore  |                                               | 0.93       | 0.89    | 0.5     | 0.31    | 8041995    | 9.84    | 10.66   | 11.26   | 10.62   |
| BANK1      | B-cell scaffold protein 1                        | chr4:1029309  | -0.26              | -1.11             | cg21997986 | Body;Body;5'UTR               |                        |                                               | 0.87       | 0.46    | 0.2     | 0.21    | 8096617    | 7.34    | 9.69    | 8.57    | 9.61    |
| GRN        | granulin                                         | chr17:397780  | -0.38              | 0.76              | cg23570245 | 5'UTR                         |                        |                                               | 0.76       | 0.81    | 0.43    | 0.23    | 8007620    | 8.70    | 7.91    | 8.67    | 9.07    |
| TCLL1A     | T-cell leukemia protein 1A                       | chr14:952460  | -0.22              | 3.27              | cg14127336 | 1stExon;1stExon               | chr14:961802: Island   |                                               | 0.87       | 0.8     | 0.57    | 0.4     | 7981183    | 6.52    | 8.42    | 11.69   | 11.97   |
| LDB2       | LIM domain binding protein 2                     | chr4:1611226  | -0.26              | -0.71             | cg07691684 | Body;Body                     |                        |                                               | 0.9        | 0.88    | 0.62    | 0.58    | 8099524    | 7.56    | 7.50    | 6.79    | 6.88    |
| FGD2       | FYVE, RhoGEF domain containing 2                 | chr6:3708140  | -0.23              | 0.83              | cg23185774 | TSS1500                       |                        |                                               | 0.93       | 0.55    | 0.32    | 0.29    | 8119132    | 7.45    | 7.08    | 7.91    | 8.70    |
| MTSS1      | metastasis suppressor 1                          | chr8:1256322  | -0.31              | 1.76              | cg15235922 | Body;Body                     |                        |                                               | 0.93       | 0.5     | 0.19    | 0.1     | 8152764    | 7.66    | 7.45    | 9.21    | 10.44   |
| PTPRJ      | protein tyrosin phosphatase receptor type J      | chr11:479586  | -0.59              | 1.05              | cg14997711 | Body;Body                     |                        |                                               | 0.81       | 0.73    | 0.14    | 0.09    | 7939839    | 7.52    | 7.45    | 8.50    | 10.27   |
| RHOBTB1    | Rho-related BTBD1                                | chr10:622992  | -0.3               | 0.85              | cg09207077 | Body;Body;Body;Body           | chr10:627033: S_Shelf  |                                               | 0.93       | 0.84    | 0.54    | 0.33    | 7933821    | 7.16    | 6.70    | 7.54    | 7.35    |
| TNFRSF1A   | tumor necrosis factor receptor 1                 | chr2:630818   | -0.24              | -1.55             | cg10589094 | TSS1500                       |                        |                                               | 0.9        | 0.67    | 0.43    | 0.48    | 7960518    | 9.20    | 8.71    | 7.17    | 7.01    |
| FOXP1      | forkhead box P1                                  | chr3:710874   | -0.22              | 0.60              | cg19776833 | Body                          |                        |                                               | 0.95       | 0.92    | 0.7     | 0.44    | 8088776    | 9.00    | 9.26    | 9.86    | 9.92    |
| VAV3       | vav 3 guanine nucleotide exchange factor 3       | chr1:1079153  | -0.53              | -1.14             | cg12047260 | Body                          |                        |                                               | 0.87       | 0.86    | 0.32    | 0.25    | 7918157    | 9.36    | 9.84    | 8.70    | 9.32    |
| CD55       | CD55 molecule                                    | chr1:2055614  | -0.27              | 0.75              | cg23633330 | Body;Body                     |                        |                                               | 0.69       | 0.68    | 0.41    | 0.23    | 7909332    | 9.02    | 9.40    | 10.15   | 10.76   |
| CDC25B     | cell division cycle 25B                          | chr20:372438  | -0.44              | 1.22              | cg02737268 | Body;Body;Body                | chr20:377619: S_Shelf  |                                               | 0.94       | 0.74    | 0.29    | 0.07    | 8060675    | 7.60    | 8.10    | 9.32    | 9.13    |
| SORL1      | sorlin-related protein 1                         | chr11:120828  | -0.38              | -1.49             | cg05921138 | Body                          |                        |                                               | 0.84       | 0.86    | 0.47    | 0.24    | 7944667    | 8.95    | 8.68    | 7.18    | 6.83    |
| JARID2     | jumonji, AT rich domain 2                        | chr6:153546   | -0.28              | 0.61              | cg26797722 | Body                          |                        |                                               | 0.91       | 0.81    | 0.53    | 0.51    | 8116998    | 8.94    | 8.53    | 9.14    | 9.14    |
| HEY2       | hairy/enhancer protein 2                         | chr6:1261105  | -0.24              | 1.05              | cg22124590 | 3'UTR                         | chr6:1260803: S_Shore  |                                               | 0.81       | 0.57    | 0.34    | 0.31    | 8121850    | 6.44    | 6.30    | 7.35    | 7.16    |
| RHOH       | ras homolog H                                    | chr4:3987496  | -0.4               | 1.40              | cg26163153 | TSS1500                       |                        |                                               | 0.9        | 0.86    | 0.46    | 0.36    | 8094743    | 8.71    | 9.16    | 10.56   | 10.17   |
| FCRL1      | Fc receptor-like protein 1                       | chr1:1560309  | -0.22              | 2.01              | cg08933467 | Body;Body;Body                |                        |                                               | 0.83       | 0.61    | 0.39    | 0.19    | 7921319    | 7.04    | 7.60    | 9.61    | 11.16   |
| SYK        | spleen tyrosine kinase                           | chr9:9260389  | -0.38              | 0.85              | cg14054883 | Body;Body;Body;Body           |                        |                                               | 0.89       | 0.89    | 0.51    | 0.48    | 8156321    | 8.92    | 9.46    | 10.31   | 10.30   |
| ROR1       | receptor tyrosin phosphatase-like 1              | chr1:640122   | -0.26              | 1.86              | cg06743782 | Body;Body                     |                        |                                               | 0.85       | 0.87    | 0.61    | 0.63    | 7901969    | 6.79    | 7.15    | 9.00    | 8.16    |
| CD180      | CD180 molecule                                   | chr5:665138   | -0.2               | 1.61              | cg19919989 | 1stExon                       |                        |                                               | 0.87       | 0.7     | 0.5     | 0.47    | 8112428    | 7.67    | 7.57    | 9.18    | 10.46   |
| TGFBR2     | transforming growth factor beta receptor 2       | chr3:306229   | -0.35              | 0.75              | cg05450916 | Body;Body                     |                        |                                               | 0.85       | 0.74    | 0.39    | 0.34    | 8078350    | 8.21    | 8.62    | 9.37    | 9.73    |
| COBL       | cordons-bleu homolog                             | chr7:5105140  | -0.33              | -0.60             | cg10765387 | Body                          |                        |                                               | 0.83       | 0.52    | 0.2     | 0.18    | 8139680    | 6.59    | 7.06    | 6.46    | 7.00    |
| NSMCE1     | non-SMC element 1                                | chr16:271438  | -0.25              | 0.91              | cg02115302 | Body                          |                        |                                               | 0.93       | 0.88    | 0.63    | 0.46    | 8000413    | 8.92    | 8.86    | 9.77    | 9.42    |
| LCP2       | lymphocyte cytoskeleton protein 2                | chr5:1696076  | -0.23              | -1.61             | cg02676052 | TSS1500                       |                        |                                               | 0.94       | 0.82    | 0.6     | 0.58    | 8115734    | 9.42    | 9.18    | 7.57    | 7.70    |
| TNFRSF17   | tumor necrosis factor receptor 17                | chr16:119664  | -0.42              | 3.60              | cg16177830 | 1stExon;5'UTR                 |                        |                                               | 0.83       | 0.76    | 0.33    | 0.14    | 7993267    | 4.93    | 5.19    | 8.80    | 7.52    |
| GALNT2     | UDP-N-acetylglucosamine 2-acetyltransferase 2    | chr11:2282695 | -0.2               | -0.59             | cg17930505 | Body                          |                        |                                               | 0.77       | 0.46    | 0.26    | 0.24    | 7910427    | 8.78    | 9.19    | 8.60    | 8.20    |
| AEBP1      | AE binding protein 1                             | chr7:4411048  | -0.22              | 0.93              | cg01399219 | Body                          |                        |                                               | 0.5        | 0.55    | 0.33    | 0.24    | 8132557    | 8.86    | 8.92    | 9.85    | 10.00   |
| GAS7       | growth arrest-specific protein 7                 | chr17:975465  | -0.34              | 0.98              | cg02605292 | Body;Body                     |                        |                                               | 0.89       | 0.64    | 0.3     | 0.22    | 8012605    | 7.56    | 7.56    | 8.54    | 7.71    |
| SPIB       | Sp1-B transcription factor 1                     | chr19:556140  | -0.21              | 1.18              | cg26522743 | TSS1500                       |                        |                                               | 0.51       | 0.48    | 0.27    | 0.15    | 8030671    | 7.30    | 7.28    | 8.45    | 8.95    |
| PIK3C2B    | phosphoinositide-dependent kinase 3 class 2 beta | chr1:2026583  | -0.27              | 0.70              | cg26064794 | Body                          |                        |                                               | 0.27       | 0.38    | 0.11    | 0.08    | 7923662    | 7.33    | 7.73    | 8.43    | 9.16    |
| CARD11     | caspase recruit domain 11                        | chr7:2912302  | -0.59              | 0.82              | cg1768768  | Body                          | chr7:2946236: S_Shore  |                                               | 0.95       | 0.72    | 0.13    | 0.03    | 8137874    | 7.93    | 7.57    | 8.39    | 9.24    |
| BLK        | B lymphoid tyrosin phosphatase                   | chr8:1138891  | -0.35              | 0.62              | cg10147394 | TSS1500                       |                        |                                               | 0.9        | 0.52    | 0.16    | 0.14    | 8144625    | 6.84    | 7.21    | 7.83    | 8.15    |
| IGF1R      | insulin-like growth factor 1 receptor            | chr15:970102  | -0.32              | -0.64             | cg03795574 | Body                          |                        |                                               | 0.79       | 0.57    | 0.26    | 0.22    | 7986359    | 8.40    | 8.40    | 7.75    | 7.42    |
| DGKD       | diacylglycerol kinase domain containing 1        | chr2:2339278  | -0.33              | 0.69              | cg25107522 | Body;Body                     |                        |                                               | 0.89       | 0.68    | 0.35    | 0.34    | 8049317    | 7.50    | 7.96    | 8.65    | 9.17    |
| CD19       | CD19 molecule                                    | chr16:288507  | -0.27              | 0.66              | cg14102807 | Body                          |                        |                                               | 0.92       | 0.56    | 0.3     | 0.25    | 7994487    | 7.54    | 8.06    | 8.72    | 9.07    |
| ZFP106     | zinc finger protein 106                          | chr15:404923  | -0.22              | 0.72              | cg03402235 | 1stExon                       |                        |                                               | 0.92       | 0.81    | 0.59    | 0.34    | 7987892    | 8.42    | 8.72    | 9.44    | 9.64    |

Supplemental Table 3c. Statistics of the 7 genes that had concurrent methylation and expression changes from S3 to S4.

| GeneSymbol | GeneTitle       | ChrLoc        | Methylation<br>.S4vsS3 | Expression<br>.S4vsS3 | IlmnID     | UCSC_RefGene_Group | UCSC_CpG_Islands_Name | Methylation<br>Relation_to_UCSC_CpG_Island | Expression |         |         |         |         |      |      |       |       |
|------------|-----------------|---------------|------------------------|-----------------------|------------|--------------------|-----------------------|--------------------------------------------|------------|---------|---------|---------|---------|------|------|-------|-------|
|            |                 |               |                        |                       |            |                    |                       |                                            | Mean.S1    | Mean.S2 | Mean.S3 | Mean.S4 |         |      |      |       |       |
| BTLA       | B and T lymph   | chr3:11366746 | -0.34                  | 2.32                  | cg24157392 | Body;Body          |                       |                                            | 0.79       | 0.86    | 0.67    | 0.33    | 8089519 | 7.29 | 6.60 | 7.73  | 10.04 |
| MCOLN2     | mucollipin 2    | chr1:85163854 | -0.22                  | 1.34                  | cg02621376 | Body               | chr1:85462581;N_Shore |                                            | 0.81       | 0.84    | 0.5     | 0.27    | 7917283 | 6.64 | 5.88 | 6.26  | 7.61  |
| ADARB1     | adenosine dea   | chr21:4531894 | -0.2                   | 0.89                  | cg19810954 | 5'UTR;5'UTR;5      | chr21:464941;S_Shore  |                                            | 0.54       | 0.77    | 0.71    | 0.52    | 8069178 | 7.31 | 6.83 | 9.17  | 10.05 |
| CARD11     | caspase recruit | chr7:2912302- | -0.23                  | 0.85                  | cg16586807 | Body               | chr7:2946236-S_Shore  |                                            | 0.96       | 0.85    | 0.37    | 0.14    | 8137874 | 7.93 | 7.57 | 8.39  | 9.24  |
| CTPS       | CTP synthase    | chr1:41217594 | -0.26                  | -0.68                 | cg06083001 | 3'UTR              |                       |                                            | 0.82       | 0.86    | 0.78    | 0.52    | 7900510 | 9.53 | 9.91 | 9.88  | 9.20  |
| CLEC4C     | C-type lectin d | chr12:7773278 | -0.22                  | 0.82                  | cg22194129 | 5'UTR;5'UTR        |                       |                                            | 0.85       | 0.86    | 0.61    | 0.38    | 7960832 | 6.74 | 6.20 | 6.35  | 7.17  |
| GLO1       | glyoxalase I    | chr6:38751635 | -0.28                  | -0.79                 | cg26053840 | 3'UTR              |                       |                                            | 0.89       | 0.91    | 0.7     | 0.42    | 8126135 | 9.28 | 9.83 | 10.26 | 9.47  |

**Supplemental Table 4:** Genes in which expression changes were delayed from methylation changes

| CpG        | chrom | position  | Gene             | Methylation change   | Expression change             |
|------------|-------|-----------|------------------|----------------------|-------------------------------|
| cg00226923 | chr6  | 36972027  | <i>FGD2</i>      | de-DMR from S1 to S2 | Upregulated DEG from S2 to S3 |
| cg01468567 | chr19 | 49843922  | <i>TEAD2</i>     | de-DMR from S1 to S2 | Upregulated DEG from S2 to S3 |
| cg01758575 | chr16 | 28943288  | <i>CD19</i>      | de-DMR from S1 to S2 | Upregulated DEG from S2 to S3 |
| cg01801603 | chr8  | 123795433 | <i>ZHX2</i>      | de-DMR from S1 to S2 | Upregulated DEG from S2 to S3 |
| cg01883759 | chr7  | 28220576  | <i>JAZF1</i>     | de-DMR from S1 to S2 | Upregulated DEG from S2 to S3 |
| cg02368508 | chr16 | 12060182  | <i>TNFRSF17</i>  | de-DMR from S1 to S2 | Upregulated DEG from S2 to S3 |
| cg02585724 | chr15 | 81116461  | <i>KIAA1199</i>  | de-DMR from S1 to S2 | Upregulated DEG from S2 to S3 |
| cg02903589 | chr6  | 18215340  | <i>KDM1B</i>     | de-DMR from S1 to S2 | Upregulated DEG from S2 to S3 |
| cg03220363 | chr8  | 134115661 | <i>TG</i>        | de-DMR from S1 to S2 | Upregulated DEG from S2 to S3 |
| cg04499011 | chr6  | 36972127  | <i>FGD2</i>      | de-DMR from S1 to S2 | Upregulated DEG from S2 to S3 |
| cg04515608 | chr11 | 48129067  | <i>PTPRJ</i>     | de-DMR from S1 to S2 | Upregulated DEG from S2 to S3 |
| cg04728789 | chr22 | 38711154  | <i>CSNK1E</i>    | de-DMR from S1 to S2 | Upregulated DEG from S2 to S3 |
| cg04856396 | chr17 | 3589140   | <i>P2RX5</i>     | de-DMR from S1 to S2 | Upregulated DEG from S2 to S3 |
| cg05234415 | chr19 | 38743744  | <i>PPP1R14A</i>  | de-DMR from S1 to S2 | Upregulated DEG from S2 to S3 |
| cg05433111 | chr16 | 28943232  | <i>CD19</i>      | de-DMR from S1 to S2 | Upregulated DEG from S2 to S3 |
| cg06323049 | chr16 | 28943094  | <i>CD19</i>      | de-DMR from S1 to S2 | Upregulated DEG from S2 to S3 |
| cg06510261 | chr3  | 111852227 | <i>GCET2</i>     | de-DMR from S1 to S2 | Upregulated DEG from S2 to S3 |
| cg07597976 | chr16 | 28943019  | <i>CD19</i>      | de-DMR from S1 to S2 | Upregulated DEG from S2 to S3 |
| cg07613391 | chr3  | 30708746  | <i>TGFB2</i>     | de-DMR from S1 to S2 | Upregulated DEG from S2 to S3 |
| cg07618900 | chr12 | 70093350  | <i>BEST3</i>     | de-DMR from S1 to S2 | Upregulated DEG from S2 to S3 |
| cg08449164 | chr2  | 54784402  | <i>SPTBN1</i>    | de-DMR from S1 to S2 | Upregulated DEG from S2 to S3 |
| cg08818610 | chr6  | 24910720  | <i>FAM65B</i>    | de-DMR from S1 to S2 | Upregulated DEG from S2 to S3 |
| cg09299082 | chr17 | 45286354  | <i>MYL4</i>      | de-DMR from S1 to S2 | Upregulated DEG from S2 to S3 |
| cg09832911 | chr10 | 45923678  | <i>ALOX5</i>     | de-DMR from S1 to S2 | Upregulated DEG from S2 to S3 |
| cg10274108 | chr4  | 38082931  | <i>TBC1D1</i>    | de-DMR from S1 to S2 | Upregulated DEG from S2 to S3 |
| cg10397389 | chr4  | 100738011 | <i>DAPP1</i>     | de-DMR from S1 to S2 | Upregulated DEG from S2 to S3 |
| cg10517535 | chr17 | 9929698   | <i>GAS7</i>      | de-DMR from S1 to S2 | Upregulated DEG from S2 to S3 |
| cg10707081 | chr13 | 67721697  | <i>PCDH9</i>     | de-DMR from S1 to S2 | Upregulated DEG from S2 to S3 |
| cg11293275 | chr5  | 131543977 | <i>P4HA2</i>     | de-DMR from S1 to S2 | Upregulated DEG from S2 to S3 |
| cg12810837 | chr12 | 9822287   | <i>CLEC2D</i>    | de-DMR from S1 to S2 | Upregulated DEG from S2 to S3 |
| cg13409077 | chr9  | 35618528  | <i>CD72</i>      | de-DMR from S1 to S2 | Upregulated DEG from S2 to S3 |
| cg13559409 | chr9  | 107545269 | <i>ABCA1</i>     | de-DMR from S1 to S2 | Upregulated DEG from S2 to S3 |
| cg14973892 | chr13 | 46944143  | <i>KIAA0226L</i> | de-DMR from S1 to S2 | Upregulated DEG from S2 to S3 |
| cg15706621 | chr2  | 54861447  | <i>SPTBN1</i>    | de-DMR from S1 to S2 | Upregulated DEG from S2 to S3 |
| cg16111231 | chr6  | 160399700 | <i>IGF2R</i>     | de-DMR from S1 to S2 | Upregulated DEG from S2 to S3 |
| cg16495448 | chr7  | 3019260   | <i>CARD11</i>    | de-DMR from S1 to S2 | Upregulated DEG from S2 to S3 |
| cg18967835 | chr13 | 99907350  | <i>GPR18</i>     | de-DMR from S1 to S2 | Upregulated DEG from S2 to S3 |
| cg21195376 | chr1  | 204449827 | <i>PIK3C2B</i>   | de-DMR from S1 to S2 | Upregulated DEG from S2 to S3 |
| cg21614638 | chr4  | 100737821 | <i>DAPP1</i>     | de-DMR from S1 to S2 | Upregulated DEG from S2 to S3 |
| cg22256853 | chr3  | 111840865 | <i>GCET2</i>     | de-DMR from S1 to S2 | Upregulated DEG from S2 to S3 |
| cg22826986 | chr8  | 11351507  | <i>BLK</i>       | de-DMR from S1 to S2 | Upregulated DEG from S2 to S3 |
| cg22888848 | chr2  | 222320536 | <i>EPHA4</i>     | de-DMR from S1 to S2 | Upregulated DEG from S2 to S3 |
| cg24856456 | chr8  | 56923352  | <i>LYN</i>       | de-DMR from S1 to S2 | Upregulated DEG from S2 to S3 |
| cg24960799 | chr6  | 24908812  | <i>FAM65B</i>    | de-DMR from S1 to S2 | Upregulated DEG from S2 to S3 |
| cg25115537 | chr8  | 123801352 | <i>ZHX2</i>      | de-DMR from S1 to S2 | Upregulated DEG from S2 to S3 |
| cg25821783 | chr17 | 63746944  | <i>CEP112</i>    | de-DMR from S1 to S2 | Upregulated DEG from S2 to S3 |
| cg26291600 | chr10 | 45923705  | <i>ALOX5</i>     | de-DMR from S1 to S2 | Upregulated DEG from S2 to S3 |
| cg27565966 | chr16 | 28943198  | <i>CD19</i>      | de-DMR from S1 to S2 | Upregulated DEG from S2 to S3 |
| cg00129811 | chr6  | 116726398 | <i>DSE</i>       | de-DMR from S1 to S2 | Upregulated DEG from S3 to S4 |
| cg00226923 | chr6  | 36972027  | <i>FGD2</i>      | de-DMR from S1 to S2 | Upregulated DEG from S3 to S4 |
| cg01468567 | chr19 | 49843922  | <i>TEAD2</i>     | de-DMR from S1 to S2 | Upregulated DEG from S3 to S4 |
| cg02212836 | chr6  | 6589075   | <i>LY86</i>      | de-DMR from S1 to S2 | Upregulated DEG from S3 to S4 |
| cg03220363 | chr8  | 134115661 | <i>TG</i>        | de-DMR from S1 to S2 | Upregulated DEG from S3 to S4 |
| cg03349397 | chr6  | 6588693   | <i>LY86</i>      | de-DMR from S1 to S2 | Upregulated DEG from S3 to S4 |

|            |       |           |                |                           |                                 |
|------------|-------|-----------|----------------|---------------------------|---------------------------------|
| cg03753191 | chr13 | 43566902  | <i>EPST11</i>  | de-DMR from S1 to S2      | Upregulated DEG from S3 to S4   |
| cg04499011 | chr6  | 36972127  | <i>FGD2</i>    | de-DMR from S1 to S2      | Upregulated DEG from S3 to S4   |
| cg04515608 | chr11 | 48129067  | <i>PTPRJ</i>   | de-DMR from S1 to S2      | Upregulated DEG from S3 to S4   |
| cg04599946 | chr16 | 85936480  | <i>IRF8</i>    | de-DMR from S1 to S2      | Upregulated DEG from S3 to S4   |
| cg04856396 | chr17 | 3589140   | <i>P2RX5</i>   | de-DMR from S1 to S2      | Upregulated DEG from S3 to S4   |
| cg05021589 | chr6  | 6588931   | <i>LY86</i>    | de-DMR from S1 to S2      | Upregulated DEG from S3 to S4   |
| cg05033369 | chr1  | 161676469 | <i>FCRLA</i>   | de-DMR from S1 to S2      | Upregulated DEG from S3 to S4   |
| cg05257202 | chr13 | 99934873  | <i>UBAC2</i>   | de-DMR from S1 to S2      | Upregulated DEG from S3 to S4   |
| cg06806711 | chr11 | 60223291  | <i>MS4A1</i>   | de-DMR from S1 to S2      | Upregulated DEG from S3 to S4   |
| cg06829760 | chr2  | 16845412  | <i>FAM49A</i>  | de-DMR from S1 to S2      | Upregulated DEG from S3 to S4   |
| cg07623567 | chr6  | 32909523  | <i>HLA-DMB</i> | de-DMR from S1 to S2      | Upregulated DEG from S3 to S4   |
| cg07978738 | chr10 | 116298339 | <i>ABLIM1</i>  | de-DMR from S1 to S2      | Upregulated DEG from S3 to S4   |
| cg08174715 | chr19 | 43012255  | <i>CEACAM1</i> | de-DMR from S1 to S2      | Upregulated DEG from S3 to S4   |
| cg08529529 | chr13 | 31309799  | <i>ALOX5AP</i> | de-DMR from S1 to S2      | Upregulated DEG from S3 to S4   |
| cg08933467 | chr1  | 157776690 | <i>FCRL1</i>   | de-DMR from S1 to S2      | Upregulated DEG from S3 to S4   |
| cg09100014 | chr16 | 85937496  | <i>IRF8</i>    | de-DMR from S1 to S2      | Upregulated DEG from S3 to S4   |
| cg09832911 | chr10 | 45923678  | <i>ALOX5</i>   | de-DMR from S1 to S2      | Upregulated DEG from S3 to S4   |
| cg09970481 | chr19 | 42379744  | <i>CD79A</i>   | de-DMR from S1 to S2      | Upregulated DEG from S3 to S4   |
| cg10466421 | chr21 | 27010696  | <i>JAM2</i>    | de-DMR from S1 to S2      | Upregulated DEG from S3 to S4   |
| cg10853416 | chr11 | 60145275  | <i>MS4A7</i>   | de-DMR from S1 to S2      | Upregulated DEG from S3 to S4   |
| cg13066703 | chr1  | 211526705 | <i>TRAF5</i>   | de-DMR from S1 to S2      | Upregulated DEG from S3 to S4   |
| cg13125224 | chr6  | 6587445   | <i>LY86</i>    | de-DMR from S1 to S2      | Upregulated DEG from S3 to S4   |
| cg13765961 | chr11 | 60223238  | <i>MS4A1</i>   | de-DMR from S1 to S2      | Upregulated DEG from S3 to S4   |
| cg15235922 | chr8  | 125678187 | <i>MTSS1</i>   | de-DMR from S1 to S2      | Upregulated DEG from S3 to S4   |
| cg15474337 | chr19 | 50848247  | <i>NAPSB</i>   | de-DMR from S1 to S2      | Upregulated DEG from S3 to S4   |
| cg15975769 | chr3  | 19521725  | <i>KCNH8</i>   | de-DMR from S1 to S2      | Upregulated DEG from S3 to S4   |
| cg16495448 | chr7  | 3019260   | <i>CARD11</i>  | de-DMR from S1 to S2      | Upregulated DEG from S3 to S4   |
| cg16705546 | chr16 | 85936666  | <i>IRF8</i>    | de-DMR from S1 to S2      | Upregulated DEG from S3 to S4   |
| cg17100176 | chr1  | 207096358 | <i>FAIM3</i>   | de-DMR from S1 to S2      | Upregulated DEG from S3 to S4   |
| cg17768768 | chr7  | 2948123   | <i>CARD11</i>  | de-DMR from S1 to S2      | Upregulated DEG from S3 to S4   |
| cg17981790 | chr2  | 16807234  | <i>FAM49A</i>  | de-DMR from S1 to S2      | Upregulated DEG from S3 to S4   |
| cg18865207 | chr1  | 160765919 | <i>LY9</i>     | de-DMR from S1 to S2      | Upregulated DEG from S3 to S4   |
| cg18920397 | chr1  | 160765805 | <i>LY9</i>     | de-DMR from S1 to S2      | Upregulated DEG from S3 to S4   |
| cg19190593 | chr6  | 6588737   | <i>LY86</i>    | de-DMR from S1 to S2      | Upregulated DEG from S3 to S4   |
| cg19583076 | chr19 | 42381099  | <i>CD79A</i>   | de-DMR from S1 to S2      | Upregulated DEG from S3 to S4   |
| cg19825589 | chr19 | 42379710  | <i>CD79A</i>   | de-DMR from S1 to S2      | Upregulated DEG from S3 to S4   |
| cg20419542 | chr6  | 116726587 | <i>DSE</i>     | de-DMR from S1 to S2      | Upregulated DEG from S3 to S4   |
| cg21195376 | chr1  | 204449827 | <i>PIK3C2B</i> | de-DMR from S1 to S2      | Upregulated DEG from S3 to S4   |
| cg21470947 | chr6  | 32909493  | <i>HLA-DMB</i> | de-DMR from S1 to S2      | Upregulated DEG from S3 to S4   |
| cg21997986 | chr4  | 102745414 | <i>BANK1</i>   | de-DMR from S1 to S2      | Upregulated DEG from S3 to S4   |
| cg22518157 | chr4  | 36210723  | <i>ARAP2</i>   | de-DMR from S1 to S2      | Upregulated DEG from S3 to S4   |
| cg22610434 | chr1  | 158259914 | <i>CD1C</i>    | de-DMR from S1 to S2      | Upregulated DEG from S3 to S4   |
| cg22888848 | chr2  | 222320536 | <i>EPHA4</i>   | de-DMR from S1 to S2      | Upregulated DEG from S3 to S4   |
| cg22945467 | chr1  | 207096833 | <i>FAIM3</i>   | de-DMR from S1 to S2      | Upregulated DEG from S3 to S4   |
| cg23185774 | chr6  | 36972163  | <i>FGD2</i>    | de-DMR from S1 to S2      | Upregulated DEG from S3 to S4   |
| cg23730277 | chr4  | 102734752 | <i>BANK1</i>   | de-DMR from S1 to S2      | Upregulated DEG from S3 to S4   |
| cg24703661 | chr19 | 42381258  | <i>CD79A</i>   | de-DMR from S1 to S2      | Upregulated DEG from S3 to S4   |
| cg24856456 | chr8  | 56923352  | <i>LYN</i>     | de-DMR from S1 to S2      | Upregulated DEG from S3 to S4   |
| cg26291600 | chr10 | 45923705  | <i>ALOX5</i>   | de-DMR from S1 to S2      | Upregulated DEG from S3 to S4   |
| cg27208925 | chr16 | 85937106  | <i>IRF8</i>    | de-DMR from S1 to S2      | Upregulated DEG from S3 to S4   |
| cg01005605 | chr2  | 60757902  | <i>BCL11A</i>  | de novo DMR from S1 to S2 | Downregulated DEG from S2 to S3 |
| cg01290568 | chr2  | 113593859 | <i>IL1B</i>    | de novo DMR from S1 to S2 | Downregulated DEG from S2 to S3 |
| cg02816367 | chr6  | 112081490 | <i>FYN</i>     | de novo DMR from S1 to S2 | Downregulated DEG from S2 to S3 |
| cg03348161 | chr11 | 59824089  | <i>MS4A3</i>   | de novo DMR from S1 to S2 | Downregulated DEG from S2 to S3 |
| cg04086531 | chr16 | 49732376  | <i>ZNF423</i>  | de novo DMR from S1 to S2 | Downregulated DEG from S2 to S3 |
| cg05517541 | chr6  | 112115209 | <i>FYN</i>     | de novo DMR from S1 to S2 | Downregulated DEG from S2 to S3 |
| cg06192883 | chr15 | 52554171  | <i>MYO5C</i>   | de novo DMR from S1 to S2 | Downregulated DEG from S2 to S3 |



|            |       |           |                   |                                  |                                 |
|------------|-------|-----------|-------------------|----------------------------------|---------------------------------|
| cg06399735 | chr8  | 18836280  | <i>PSD3</i>       | <i>de novo</i> DMR from S1 to S2 | Downregulated DEG from S2 to S3 |
| cg06650246 | chr1  | 206897270 | <i>MAPKAPK2</i>   | <i>de novo</i> DMR from S1 to S2 | Downregulated DEG from S2 to S3 |
| cg06688763 | chr7  | 92238207  | <i>CDK6</i>       | <i>de novo</i> DMR from S1 to S2 | Downregulated DEG from S2 to S3 |
| cg07091220 | chr4  | 146752115 | <i>ZNF827</i>     | <i>de novo</i> DMR from S1 to S2 | Downregulated DEG from S2 to S3 |
| cg07772516 | chr15 | 52107742  | <i>TMOD2</i>      | <i>de novo</i> DMR from S1 to S2 | Downregulated DEG from S2 to S3 |
| cg08601457 | chr6  | 112115117 | <i>FYN</i>        | <i>de novo</i> DMR from S1 to S2 | Downregulated DEG from S2 to S3 |
| cg09080522 | chr22 | 44568387  | <i>PARVG</i>      | <i>de novo</i> DMR from S1 to S2 | Downregulated DEG from S2 to S3 |
| cg09472600 | chr1  | 183537770 | <i>NCF2</i>       | <i>de novo</i> DMR from S1 to S2 | Downregulated DEG from S2 to S3 |
| cg09824900 | chr15 | 99227735  | <i>IGF1R</i>      | <i>de novo</i> DMR from S1 to S2 | Downregulated DEG from S2 to S3 |
| cg11091914 | chr8  | 105598224 | <i>LRP12</i>      | <i>de novo</i> DMR from S1 to S2 | Downregulated DEG from S2 to S3 |
| cg11303988 | chr8  | 19266685  | <i>CSGALNACT1</i> | <i>de novo</i> DMR from S1 to S2 | Downregulated DEG from S2 to S3 |
| cg12554857 | chr4  | 95264019  | <i>HPGDS</i>      | <i>de novo</i> DMR from S1 to S2 | Downregulated DEG from S2 to S3 |
| cg13359998 | chr1  | 230241764 | <i>GALNT2</i>     | <i>de novo</i> DMR from S1 to S2 | Downregulated DEG from S2 to S3 |
| cg15836722 | chr2  | 113593785 | <i>IL1B</i>       | <i>de novo</i> DMR from S1 to S2 | Downregulated DEG from S2 to S3 |
| cg17753789 | chr10 | 81026766  | <i>ZMIZ1</i>      | <i>de novo</i> DMR from S1 to S2 | Downregulated DEG from S2 to S3 |
| cg17854066 | chr4  | 55575932  | <i>KIT</i>        | <i>de novo</i> DMR from S1 to S2 | Downregulated DEG from S2 to S3 |
| cg20744163 | chr10 | 80999841  | <i>ZMIZ1</i>      | <i>de novo</i> DMR from S1 to S2 | Downregulated DEG from S2 to S3 |
| cg20909017 | chr12 | 54805345  | <i>ITGA5</i>      | <i>de novo</i> DMR from S1 to S2 | Downregulated DEG from S2 to S3 |
| cg22328837 | chr6  | 45422120  | <i>RUNX2</i>      | <i>de novo</i> DMR from S1 to S2 | Downregulated DEG from S2 to S3 |
| cg23261343 | chr6  | 45413792  | <i>RUNX2</i>      | <i>de novo</i> DMR from S1 to S2 | Downregulated DEG from S2 to S3 |
| cg24168002 | chr2  | 169588344 | <i>CERS6</i>      | <i>de novo</i> DMR from S1 to S2 | Downregulated DEG from S2 to S3 |
| cg24211388 | chr6  | 31582837  | <i>AIF1</i>       | <i>de novo</i> DMR from S1 to S2 | Downregulated DEG from S2 to S3 |
| cg24590708 | chr15 | 52554357  | <i>MYO5C</i>      | <i>de novo</i> DMR from S1 to S2 | Downregulated DEG from S2 to S3 |
| cg26280911 | chr5  | 133891771 | <i>PHF15</i>      | <i>de novo</i> DMR from S1 to S2 | Downregulated DEG from S2 to S3 |
| cg26394055 | chr1  | 161184921 | <i>FCER1G</i>     | <i>de novo</i> DMR from S1 to S2 | Downregulated DEG from S2 to S3 |
| cg26929700 | chr16 | 49732567  | <i>ZNF423</i>     | <i>de novo</i> DMR from S1 to S2 | Downregulated DEG from S2 to S3 |
| cg27606341 | chr5  | 39219632  | <i>FYB</i>        | <i>de novo</i> DMR from S1 to S2 | Downregulated DEG from S2 to S3 |
| cg02225720 | chr17 | 3623472   | <i>ITGAE</i>      | <i>de novo</i> DMR from S1 to S2 | Downregulated DEG from S3 to S4 |
| cg04739200 | chr6  | 135517046 | <i>MYB</i>        | <i>de novo</i> DMR from S1 to S2 | Downregulated DEG from S3 to S4 |
| cg05568549 | chr6  | 41907198  | <i>CCND3</i>      | <i>de novo</i> DMR from S1 to S2 | Downregulated DEG from S3 to S4 |
| cg06688763 | chr7  | 92238207  | <i>CDK6</i>       | <i>de novo</i> DMR from S1 to S2 | Downregulated DEG from S3 to S4 |
| cg10785340 | chr5  | 134715577 | <i>H2AFY</i>      | <i>de novo</i> DMR from S1 to S2 | Downregulated DEG from S3 to S4 |
| cg15153141 | chr5  | 81470056  | <i>ATG10</i>      | <i>de novo</i> DMR from S1 to S2 | Downregulated DEG from S3 to S4 |
| cg20981848 | chr20 | 11899258  | <i>BTBD3</i>      | <i>de novo</i> DMR from S1 to S2 | Downregulated DEG from S3 to S4 |
| cg26288715 | chr6  | 135506834 | <i>MYB</i>        | <i>de novo</i> DMR from S1 to S2 | Downregulated DEG from S3 to S4 |
| cg27434890 | chr6  | 135517041 | <i>MYB</i>        | <i>de novo</i> DMR from S1 to S2 | Downregulated DEG from S3 to S4 |

**Supplementary Table 5.** Methylation and expression changes of the 65 genes exhibiting methylation changes in CpG sites located in non-CGI region and in promoters with accompanied inversedly correlated expression changes.

| IlmnID     | Ch<br>r | Pos       | RefSeq       | gene     | $\Delta$ methylatio<br>n | $\Delta$ Expressio<br>n | Stage  |
|------------|---------|-----------|--------------|----------|--------------------------|-------------------------|--------|
| cg12126686 | 19      | 35821634  | NM_001771    | CD22     | -0.732                   | 2.190                   | S2vsS1 |
| cg12810837 | 12      | 9822287   | NM_001004419 | CLEC2D   | -0.731                   | 1.839                   | S2vsS1 |
| cg17169196 | 6       | 31540026  | NM_000595    | LTA      | -0.718                   | 0.666                   | S2vsS1 |
| cg20847766 | 13      | 111840490 | NM_003899    | ARHGEF7  | -0.701                   | 0.618                   | S2vsS1 |
| cg04776489 | 22      | 22597965  | NM_007128    | VPREB1   | -0.693                   | 2.835                   | S2vsS1 |
| cg06806711 | 11      | 60223291  | NM_152866    | MS4A1    | -0.690                   | 2.348                   | S2vsS1 |
| cg03302822 | 10      | 99928067  | NM_014472    | C10orf28 | -0.685                   | 0.851                   | S2vsS1 |
| cg23324787 | 11      | 36619694  | NM_000536    | C11orf74 | -0.648                   | 3.237                   | S2vsS1 |
| cg21923959 | 11      | 111250566 | NM_006235    | POU2AF1  | -0.639                   | 1.281                   | S2vsS1 |
| cg21370522 | 6       | 31543219  | NM_000594    | TNF      | -0.619                   | 0.872                   | S2vsS1 |
| cg06288355 | 11      | 36589379  | NM_000448    | RAG1     | -0.582                   | 1.988                   | S2vsS1 |
| cg09588020 | 1       | 27755803  | NM_006990    | WASF2    | -0.563                   | 0.661                   | S2vsS1 |
| cg13125224 | 6       | 6587445   | NM_004271    | LY86     | -0.558                   | 1.148                   | S2vsS1 |
| cg20894963 | 12      | 9885564   | NM_172004    | CLECL1   | -0.527                   | 1.325                   | S3vsS2 |
| cg25812095 | 2       | 144998514 | NM_001006636 | GTDC1    | -0.522                   | 0.861                   | S2vsS1 |
| cg25115537 | 8       | 123801352 | NM_014943    | ZHX2     | -0.514                   | 2.459                   | S2vsS1 |
| cg17981790 | 2       | 16807234  | NM_030797    | FAM49A   | -0.508                   | 1.046                   | S2vsS1 |
| cg17936572 | 3       | 35706114  | NM_016300    | ARPP-21  | -0.508                   | 3.013                   | S2vsS1 |
| cg20728490 | 10      | 98064175  | NM_004088    | DNMT     | -0.505                   | 4.374                   | S2vsS1 |
| cg10678215 | 5       | 143191565 | NM_021182    | HMHB1    | -0.498                   | 1.540                   | S2vsS1 |
| cg04888234 | 1       | 161675579 | NM_032738    | FCRLA    | -0.466                   | 2.649                   | S3vsS2 |
| cg06510261 | 3       | 111852227 | NM_001008756 | GCET2    | -0.463                   | 1.492                   | S2vsS1 |
| cg12663553 | 3       | 111852312 | NM_001008756 | GCET2    | -0.451                   | 1.974                   | S3vsS2 |
| cg20743720 | 6       | 143257108 | NM_006734    | HIVEP2   | -0.451                   | 1.942                   | S2vsS1 |
| cg19825589 | 19      | 42379710  | NM_001783    | CD79A    | -0.430                   | 1.983                   | S2vsS1 |
| cg18448570 | 10      | 98031337  | NM_013314    | BLNK     | -0.426                   | 1.906                   | S2vsS1 |
| cg16177830 | 16      | 12059019  | NM_001192    | TNFRSF17 | -0.425                   | 3.689                   | S3vsS2 |
| cg08719515 | 5       | 115857138 | NM_020796    | SEMA6A   | -0.418                   | 1.456                   | S2vsS1 |

|            |    |           |              |          |        |        |        |
|------------|----|-----------|--------------|----------|--------|--------|--------|
| cg19558972 | 22 | 23922378  | NM_020070    | IGLL1    | -0.415 | 0.658  | S2vsS1 |
| cg26163153 | 4  | 40197912  | NM_004310    | RHOH     | -0.400 | 1.400  | S3vsS2 |
| cg23570245 | 17 | 42426011  | NM_002087    | GRN      | -0.381 | 0.832  | S3vsS2 |
| cg19371652 | 12 | 113415883 | NM_002535    | OAS2     | -0.368 | 0.923  | S2vsS1 |
| cg10147394 | 8  | 11350297  | NM_001715    | BLK      | -0.355 | 0.596  | S3vsS2 |
| cg13708298 | 6  | 24900051  | NM_014722    | FAM65B   | -0.301 | 0.675  | S3vsS2 |
| cg08529529 | 13 | 31309799  | NM_001629    | ALOX5AP  | -0.293 | 0.741  | S2vsS1 |
| cg26340740 | 11 | 58980377  | NM_001039396 | MPEG1    | -0.264 | 2.202  | S3vsS2 |
| cg03112433 | 7  | 90338555  | NM_012395    | CDK14    | -0.261 | 0.907  | S3vsS2 |
| cg14168009 | 7  | 3082006   | NM_032415    | CARD11   | -0.254 | 0.731  | S3vsS2 |
| cg04312209 | 5  | 35857130  | NM_002185    | IL7R     | -0.248 | 2.550  | S2vsS1 |
| cg13782919 | 9  | 93588842  | NM_003177    | SYK      | -0.243 | 0.809  | S3vsS2 |
| cg22194129 | 12 | 7901661   | NM_130441    | CLEC4C   | -0.234 | 0.799  | S4vsS2 |
| cg08001559 | 14 | 52326905  | NM_053064    | GNG2     | -0.230 | 1.147  | S2vsS1 |
| cg23185774 | 6  | 36972163  | NM_173558    | FGD2     | -0.226 | 0.797  | S3vsS2 |
| cg25799109 | 3  | 57102900  | NM_001128615 | ARHGEF3  | -0.223 | 0.821  | S3vsS2 |
| cg03402235 | 15 | 42749336  | NM_022473    | ZFP106   | -0.223 | 0.610  | S3vsS2 |
| cg22945467 | 1  | 207096833 | NM_005449    | FAIM3    | -0.222 | 1.773  | S2vsS1 |
| cg07618900 | 12 | 70093350  | NM_032735    | BEST3    | -0.210 | 1.961  | S2vsS1 |
| cg26522743 | 19 | 50921745  | NM_003121    | SPIB     | -0.207 | 1.223  | S3vsS2 |
| cg05033369 | 1  | 161676469 | NM_032738    | FCRLA    | -0.198 | 1.149  | S2vsS1 |
| cg19919989 | 5  | 66492464  | NM_005582    | CD180    | -0.195 | 1.642  | S3vsS2 |
| cg19705564 | 14 | 105389886 | NM_138790    | PLD4     | -0.195 | 0.671  | S3vsS2 |
| cg12554857 | 4  | 95264019  | NM_014485    | HPGDS    | 0.209  | -3.854 | S2vsS1 |
| cg03348161 | 11 | 59824089  | NM_006138    | MS4A3    | 0.210  | -2.589 | S2vsS1 |
| cg19766471 | 11 | 2322802   | NM_139022    | C11orf21 | 0.244  | -0.645 | S2vsS1 |
| cg24474182 | 3  | 151047307 | NM_176894    | MED12L   | 0.261  | -0.583 | S2vsS1 |
| cg21495704 | 19 | 36399346  | NM_003332    | TYROBP   | 0.262  | -0.725 | S2vsS1 |
| cg14112601 | 6  | 10520874  | NM_145649    | GCNT2    | 0.264  | -0.934 | S2vsS1 |
| cg26394055 | 1  | 161184921 | NM_004106    | FCER1G   | 0.277  | -1.669 | S2vsS1 |
| cg17969683 | 8  | 24151514  | NM_014265    | ADAM28   | 0.278  | -2.571 | S2vsS1 |
| cg07285167 | 1  | 36948981  | NM_156039    | CSF3R    | 0.278  | -1.904 | S2vsS1 |
| cg01290568 | 2  | 113593859 | NM_000576    | IL1B     | 0.291  | -1.080 | S2vsS1 |

|            |    |          |              |          |       |        |        |
|------------|----|----------|--------------|----------|-------|--------|--------|
| cg02240622 | 15 | 40601467 | NM_004573    | PLCB2    | 0.301 | -1.228 | S2vsS1 |
| cg27606341 | 5  | 39219632 | NM_001465    | FYB      | 0.330 | -1.676 | S2vsS1 |
| cg24536818 | 12 | 55371892 | NM_001098815 | KIAA0748 | 0.366 | -1.149 | S2vsS1 |
| cg10752406 | 19 | 827776   | NM_001700    | AZU1     | 0.398 | -1.102 | S2vsS1 |
